# Supplementary material for: Nonrelapse mortality after CAR T-cell therapy for large B-cell lymphoma: a LYSA study from the DESCAR-T registry
Source: PubMed Central journal article supplement — Blood Adv. 2023 Sep 9;7(21):6589–98. doi: 10.1182/bloodadvances.2023010624 (PMC10641092; doi:10.1182/bloodadvances.2023010624), 2023-09-09
Supplement: BLOODA_ADV-2023-010624-mmc1.pdf [file BLOODA_ADV-2023-010624-mmc1.pdf]

# Supplementals

**S1. Patient characteristics at baseline – p2**

**S2: Survival of the entire cohort of patients treated with commercial axi-cel or tisacel from the French DESCAR-T registry – p3**

**S3. Risk factors for early NRM - univariate analysis – p4**

**S4. Risk factors for overall NRM - univariate analysis – p18**

**S5. Risk factors for overall NRM of infectious cause – univariate analysis – p32**

## Supplementals

### S1. Patient characteristics at baseline

|                                                            | Overall population<br>(N=957) |
|------------------------------------------------------------|-------------------------------|
| Age                                                        |                               |
| Median (range) – yr                                        | 63 (18-82)                    |
| ≥65 yr – no. (%)                                           | 412 (43.1)                    |
| ≥70 yr – no. (%)                                           | 241 (25.2)                    |
| Male sex – no. (%)                                         | 586 (61.2)                    |
| ECOG PS - no. (%)                                          |                               |
| 0-1                                                        | 772 (80.7)                    |
| ≥ 2                                                        | 120 (12.5)                    |
| Histology                                                  |                               |
| DLBCL – no. (%)                                            | 687 (71.8)                    |
| PMBL – no. (%)                                             | 43 (4.5)                      |
| HGBL – no. (%)                                             | 29 (3.0)                      |
| tFL – no. (%)                                              | 137 (14.3)                    |
| Other* – no. (%)                                           | 61 (6.4)                      |
| aaIPI - no. (%)                                            |                               |
| 0                                                          | 68 (7.1)                      |
| 1                                                          | 292 (30.5)                    |
| 2                                                          | 446 (46.6)                    |
| 3                                                          | 52 (5.4)                      |
| Elevated LDH at lymphodepletion – no. (%)                  | 471 (49.2)                    |
| Hypogammaglobulinemia < 5 g/L at lymphodepletion – no. (%) | 342 (35.7)                    |
| Prior treatments                                           |                               |
| Number of prior lines – median (range)                     | 2 (1-10)                      |
| ASCT – no. (%)                                             | 199 (20.8)                    |
| Allo-SCT – no. (%)                                         | 15 (1.6)                      |
| Bridging therapy administered – no. (%)                    |                               |
| Yes                                                        | 768 (80.3)                    |
| CAR-T product                                              |                               |
| Axi-cel – no. (%)                                          | 598 (62.4)                    |
| Tisacel – no. (%)                                          | 359 (37.6)                    |

\*Other: 30 transformed marginal zone lymphomas, 20 Richter syndromes, 7 grey zone lymphomas, 2 primary central nervous system lymphomas, 2 post-transplantation lymphoproliferative disorders.

The abbreviation ECOG PS denotes Eastern Cooperative Oncology Group performance status; DLBCL: diffuse large B-cell lymphoma; PMBL: primary mediastinal B-cell lymphoma; HGBL: high-grade B-cell lymphoma; tFL: transformed follicular lymphoma; aaIPI: age-adjusted international prognostic index; LDH: lactate dehydrogenase; ASCT: autologous stem cell transplantation; Allo-SCT: allogenic stem cell transplantation; Axi-cel: axicabtagene ciloleucel; Tisacel: tisagenlecleucel.

**S2.**

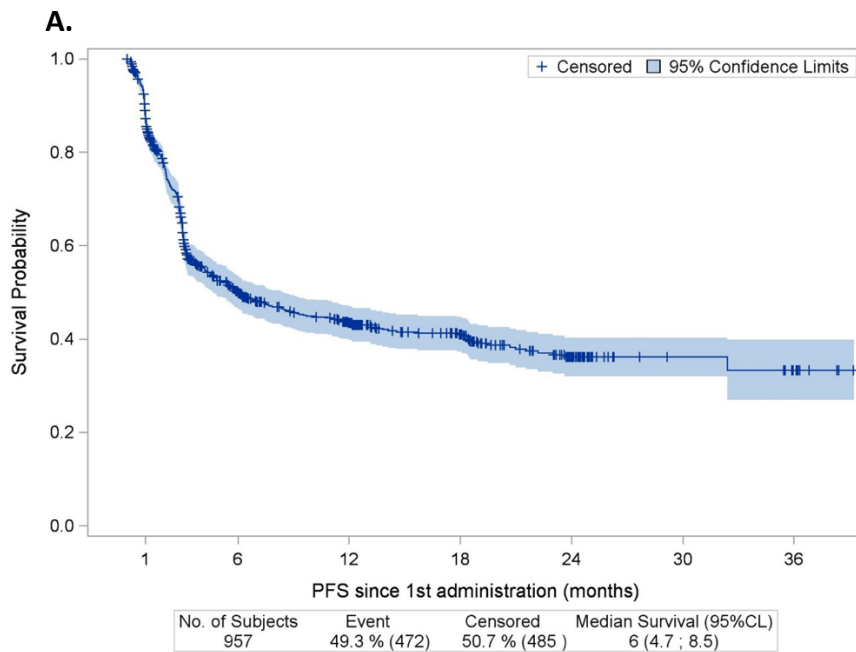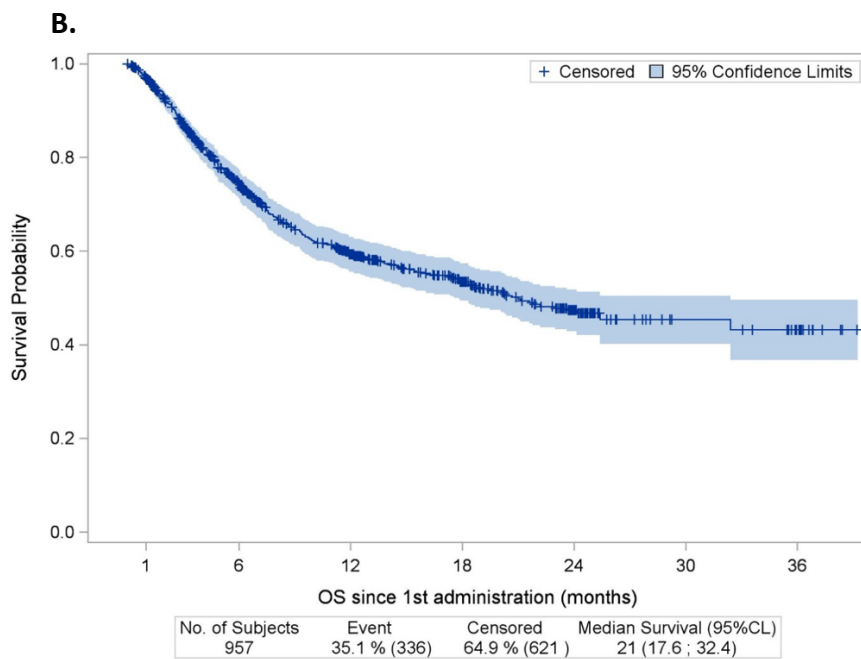

**S2: Survival of the entire cohort of patients treated with commercial axi-cel or tisacel from the French DESCAR-T registry**

A. PFS from CAR-T infusion (N=957). B. OS from CAR-T infusion (N=957).

The abbreviation PFS denotes progression free survival; OS: overall survival; axi-cel: axicabtagene ciloleucel; tisacel: tisagenlecleucel.

### S3. Risk factors for early NRM - univariate analysis

Risk factors for early NRM were identified by comparing the characteristics of early NRM population with patients alive at day 28 post-CAR T-cell infusion.

#### Patients characteristics

|                                               | NRM < D28<br>N=9 | Comparative group*<br>N=891 | Total<br>N=900 | Test: Probability         |
|-----------------------------------------------|------------------|-----------------------------|----------------|---------------------------|
| <b>Sex</b>                                    |                  |                             |                | Fisher Exact<br>P = 0.322 |
| Male                                          | 4 (44.4%)        | 546 (61.3%)                 | 550 (61.1%)    |                           |
| Female                                        | 5 (55.6%)        | 345 (38.7%)                 | 350 (38.9%)    |                           |
| <b>Age at first infusion</b>                  |                  |                             |                | Wilcoxon<br>P = 0.020     |
| N                                             | 9                | 891                         | 900            |                           |
| Missing                                       | 0                | 0                           | 0              |                           |
| Mean (SD)                                     | 66.89 (14.538)   | 60.08 (12.632)              | 60.14 (12.662) |                           |
| Median                                        | 73.00            | 63.00                       | 63.00          |                           |
| Q1; Q3                                        | 66.0 ; 75.0      | 54.0 ; 70.0                 | 54.0 ; 70.0    |                           |
| Min; Max                                      | 30.0 ; 76.0      | 18.0 ; 82.0                 | 18.0 ; 82.0    |                           |
| <b>BMI</b>                                    |                  |                             |                | Wilcoxon<br>P = 0.040     |
| N                                             | 9                | 882                         | 891            |                           |
| Missing                                       | 0                | 9                           | 9              |                           |
| Mean (SD)                                     | 22.0 (3.50)      | 29.2 (40.73)                | 29.1 (40.53)   |                           |
| Median                                        | 22.5             | 24.4                        | 24.4           |                           |
| Q1; Q3                                        | 19 ; 24          | 22 ; 28                     | 22 ; 28        |                           |
| Min; Max                                      | 18 ; 27          | 5 ; 569                     | 5 ; 569        |                           |
| <b>Pathological diagnosis at registration</b> |                  |                             |                |                           |
| DLBCL                                         | 6 (66.7%)        | 656 (73.6%)                 | 662 (73.6%)    |                           |
| DLBCL, NOS                                    | 6 (66.7%)        | 636 (71.4%)                 | 642 (71.3%)    |                           |
| DLBCL post PCNSL                              | 0 (0.0%)         | 3 (0.3%)                    | 3 (0.3%)       |                           |
| DLBCL, leg type                               | 0 (0.0%)         | 5 (0.6%)                    | 5 (0.6%)       |                           |
| T-cell/histiocyte-rich LBCL                   | 0 (0.0%)         | 12 (1.3%)                   | 12 (1.3%)      |                           |
| PMBL                                          | 0 (0.0%)         | 42 (4.7%)                   | 42 (4.7%)      |                           |
| HGBL                                          | 0 (0.0%)         | 27 (3.0%)                   | 27 (3.0%)      |                           |
| Transformed FL                                | 1 (11.1%)        | 134 (15.0%)                 | 135 (15.0%)    |                           |
| Other                                         | 2 (22.2%)        | 32 (3.6%)                   | 34 (3.8%)      |                           |
| Transformed MZL                               | 0 (0.0%)         | 23 (2.6%)                   | 23 (2.6%)      |                           |
| Transformed Richter LLC                       | 2 (22.2%)        | 8 (0.9%)                    | 10 (1.1%)      |                           |
| Transformed Richter Hodgkin                   | 0 (0.0%)         | 0 (0.0%)                    | 0 (0.0%)       |                           |
| Other                                         | 0 (0.0%)         | 0 (0.0%)                    | 0 (0.0%)       |                           |

\* Living patients at D28

## Comorbidity

|                                   | NRM < D28<br>N=9 | Comparative group*<br>N=891 | Total<br>N=900 | Test: Probability         |
|-----------------------------------|------------------|-----------------------------|----------------|---------------------------|
| <b>Solid tumour</b>               |                  |                             |                | Fisher Exact<br>P = 0.609 |
| No                                | 9 (100.0%)       | 769 (88.1%)                 | 778 (88.2%)    |                           |
| Yes                               | 0 (0.0%)         | 104 (11.9%)                 | 104 (11.8%)    |                           |
| (-)                               | 0                | 18                          | 18             |                           |
| <b>Inflammatory bowel disease</b> |                  |                             |                | Fisher Exact<br>P = 1.000 |
| No                                | 9 (100.0%)       | 867 (99.2%)                 | 876 (99.2%)    |                           |
| Yes                               | 0 (0.0%)         | 7 (0.8%)                    | 7 (0.8%)       |                           |
| (-)                               | 0                | 17                          | 17             |                           |
| <b>Rheumatologic</b>              |                  |                             |                | Fisher Exact<br>P = 1.000 |
| No                                | 9 (100.0%)       | 852 (97.5%)                 | 861 (97.5%)    |                           |
| Yes                               | 0 (0.0%)         | 22 (2.5%)                   | 22 (2.5%)      |                           |
| (-)                               | 0                | 17                          | 17             |                           |
| <b>Infection</b>                  |                  |                             |                | Fisher Exact<br>P = 1.000 |
| No                                | 9 (100.0%)       | 848 (97.4%)                 | 857 (97.4%)    |                           |
| Yes                               | 0 (0.0%)         | 23 (2.6%)                   | 23 (2.6%)      |                           |
| (-)                               | 0                | 20                          | 20             |                           |
| <b>Diabetes</b>                   |                  |                             |                | Fisher Exact<br>P = 1.000 |
| No                                | 9 (100.0%)       | 791 (90.4%)                 | 800 (90.5%)    |                           |
| Yes                               | 0 (0.0%)         | 84 (9.6%)                   | 84 (9.5%)      |                           |
| (-)                               | 0                | 16                          | 16             |                           |
| <b>Renal</b>                      |                  |                             |                | Fisher Exact<br>P = 0.187 |
| No                                | 8 (88.9%)        | 856 (97.8%)                 | 864 (97.7%)    |                           |
| Yes                               | 1 (11.1%)        | 19 (2.2%)                   | 20 (2.3%)      |                           |
| (-)                               | 0                | 16                          | 16             |                           |
| <b>Hepatic</b>                    |                  |                             |                | Fisher Exact<br>P = 1.000 |
| No                                | 9 (100.0%)       | 862 (98.9%)                 | 871 (98.9%)    |                           |
| Yes                               | 0 (0.0%)         | 10 (1.1%)                   | 10 (1.1%)      |                           |
| (-)                               | 0                | 19                          | 19             |                           |
| <b>Arrhythmia</b>                 |                  |                             |                | Fisher Exact<br>P = 0.322 |
| No                                | 8 (88.9%)        | 835 (95.9%)                 | 843 (95.8%)    |                           |
| Yes                               | 1 (11.1%)        | 36 (4.1%)                   | 37 (4.2%)      |                           |
| (-)                               | 0                | 20                          | 20             |                           |
| <b>Cardiac</b>                    |                  |                             |                | Fisher Exact<br>P = 0.505 |
| No                                | 8 (88.9%)        | 809 (92.6%)                 | 817 (92.5%)    |                           |
| Yes                               | 1 (11.1%)        | 65 (7.4%)                   | 66 (7.5%)      |                           |
| (-)                               | 0                | 17                          | 17             |                           |
| <b>Cerebrovascular disease</b>    |                  |                             |                | Fisher Exact<br>P = 0.062 |
| No                                | 7 (77.8%)        | 834 (95.5%)                 | 841 (95.4%)    |                           |
| Yes                               | 2 (22.2%)        | 39 (4.5%)                   | 41 (4.6%)      |                           |
| (-)                               | 0                | 18                          | 18             |                           |
| <b>Heart valve disease</b>        |                  |                             |                | Fisher Exact<br>P = 1.000 |
| No                                | 9 (100.0%)       | 862 (99.0%)                 | 871 (99.0%)    |                           |
| Yes                               | 0 (0.0%)         | 9 (1.0%)                    | 9 (1.0%)       |                           |
| (-)                               | 0                | 20                          | 20             |                           |
| <b>Pulmonary</b>                  |                  |                             |                | Fisher Exact<br>P = 0.424 |
| No                                | 8 (88.9%)        | 819 (94.1%)                 | 827 (94.1%)    |                           |
| Yes                               | 1 (11.1%)        | 41 (4.7%)                   | 42 (4.8%)      |                           |
| Not Evaluated                     | 0 (0.0%)         | 10 (1.1%)                   | 10 (1.1%)      |                           |
| (-)                               | 0                | 21                          | 21             |                           |
| <b>Obesity</b>                    |                  |                             |                | Fisher Exact<br>P = 1.000 |
| No                                | 9 (100.0%)       | 838 (96.1%)                 | 847 (96.1%)    |                           |
| Yes                               | 0 (0.0%)         | 33 (3.8%)                   | 33 (3.7%)      |                           |
| Not Evaluated                     | 0 (0.0%)         | 1 (0.1%)                    | 1 (0.1%)       |                           |
| (-)                               | 0                | 19                          | 19             |                           |
| <b>Peptic ulcer</b>               |                  |                             |                | Fisher Exact<br>P = 1.000 |
| No                                | 9 (100.0%)       | 864 (99.4%)                 | 873 (99.4%)    |                           |
| Yes                               | 0 (0.0%)         | 5 (0.6%)                    | 5 (0.6%)       |                           |
| (-)                               | 0                | 22                          | 22             |                           |

## Prior therapy

|                                                                       | NRM < D28<br>N=9 | Comparative group*<br>N=891 | Total<br>N=900 | Test: Probability         |
|-----------------------------------------------------------------------|------------------|-----------------------------|----------------|---------------------------|
| <b>Primary refractory disease</b>                                     |                  |                             |                | Fisher Exact<br>P = 1.000 |
| No                                                                    | 5 (55.6%)        | 481 (54.0%)                 | 486 (54.0%)    |                           |
| Yes                                                                   | 4 (44.4%)        | 410 (46.0%)                 | 414 (46.0%)    |                           |
| <b>Duration between first line end and second line start (months)</b> |                  |                             |                | Wilcoxon<br>P = 0.941     |
| N                                                                     | 9                | 832                         | 841            |                           |
| Missing                                                               | 0                | 59                          | 59             |                           |
| Mean (SD)                                                             | 11.97 (22.019)   | 16.21 (35.315)              | 16.16 (35.194) |                           |
| Median                                                                | 2.33             | 3.32                        | 3.32           |                           |
| Q1; Q3                                                                | 1.1 ; 8.8        | 1.0 ; 12.8                  | 1.0 ; 12.6     |                           |
| Min; Max                                                              | 0.7 ; 69.0       | 0.0 ; 327.1                 | 0.0 ; 327.1    |                           |
| <b>Number of prior lines</b>                                          |                  |                             |                | Wilcoxon<br>P = 0.953     |
| N                                                                     | 9                | 890                         | 899            |                           |
| Missing                                                               | 0                | 1                           | 1              |                           |
| Mean (SD)                                                             | 2.8 (1.09)       | 2.8 (1.26)                  | 2.8 (1.26)     |                           |
| Median                                                                | 2.0              | 2.0                         | 2.0            |                           |
| Q1; Q3                                                                | 2 ; 3            | 2 ; 3                       | 2 ; 3          |                           |
| Min; Max                                                              | 2 ; 5            | 1 ; 10                      | 1 ; 10         |                           |
| <b>Prior ASCT</b>                                                     |                  |                             |                | Fisher Exact<br>P = 0.218 |
| No                                                                    | 9 (100.0%)       | 696 (78.2%)                 | 705 (78.4%)    |                           |
| Yes                                                                   | 0 (0.0%)         | 194 (21.8%)                 | 194 (21.6%)    |                           |
| (-)                                                                   | 0                | 1                           | 1              |                           |
| <b>Prior allo-SCT</b>                                                 |                  |                             |                | Fisher Exact<br>P = 1.000 |
| No                                                                    | 9 (100.0%)       | 876 (98.4%)                 | 885 (98.4%)    |                           |
| Yes                                                                   | 0 (0.0%)         | 14 (1.6%)                   | 14 (1.6%)      |                           |
| (-)                                                                   | 0                | 1                           | 1              |                           |

\* Living patients at D28

## At time of multidisciplinary

|                         | NRM < D28<br>N=9 | Comparative group*<br>N=891 | Total<br>N=900 | Test: Probability                                   |
|-------------------------|------------------|-----------------------------|----------------|-----------------------------------------------------|
| <b>ECOG</b>             |                  |                             |                | Cochran-Mantel-Haenszel Row Mean Score<br>P = 0.260 |
| 0                       | 2 (22.2%)        | 349 (39.3%)                 | 351 (39.1%)    |                                                     |
| 1                       | 4 (44.4%)        | 409 (46.0%)                 | 413 (46.0%)    |                                                     |
| 2                       | 1 (11.1%)        | 70 (7.9%)                   | 71 (7.9%)      |                                                     |
| 3                       | 0 (0.0%)         | 12 (1.3%)                   | 12 (1.3%)      |                                                     |
| NE                      | 2 (22.2%)        | 49 (5.5%)                   | 51 (5.7%)      |                                                     |
| (-)                     | 0                | 2                           | 2              |                                                     |
| <b>Elevated LDH</b>     |                  |                             |                | Fisher Exact<br>P = 0.176                           |
| No                      | 1 (11.1%)        | 305 (34.6%)                 | 306 (34.3%)    |                                                     |
| Yes                     | 8 (88.9%)        | 577 (65.4%)                 | 585 (65.7%)    |                                                     |
| (-)                     | 0                | 9                           | 9              |                                                     |
| <b>aalPI</b>            |                  |                             |                | Cochran-Mantel-Haenszel Row Mean Score<br>P = 0.487 |
| 0                       | 0 (0.0%)         | 60 (7.4%)                   | 60 (7.4%)      |                                                     |
| 1                       | 1 (16.7%)        | 285 (35.2%)                 | 286 (35.1%)    |                                                     |
| 2                       | 4 (66.7%)        | 416 (51.4%)                 | 420 (51.5%)    |                                                     |
| 3                       | 1 (16.7%)        | 48 (5.9%)                   | 49 (6.0%)      |                                                     |
| (-)                     | 3                | 82                          | 85             |                                                     |
| <b>Leucocytes (G/L)</b> |                  |                             |                | Wilcoxon<br>P = -                                   |
| N                       | 0                | 0                           | 0              |                                                     |
| Missing                 | 9                | 891                         | 900            |                                                     |
| Mean (SD)               | . (.)            | . (.)                       | . (.)          |                                                     |
| Median                  | .                | .                           | .              |                                                     |
| Q1; Q3                  | . ; .            | . ; .                       | . ; .          |                                                     |
| Min; Max                | . ; .            | . ; .                       | . ; .          |                                                     |
| <b>LDH (IU/L)</b>       |                  |                             |                | Wilcoxon<br>P = -                                   |
| N                       | 0                | 0                           | 0              |                                                     |
| Missing                 | 9                | 891                         | 900            |                                                     |

|           | NRM < D28<br>N=9 | Comparative group*<br>N=891 | Total<br>N=900 | Test: Probability |
|-----------|------------------|-----------------------------|----------------|-------------------|
| Mean (SD) | . (.)            | . (.)                       | . (.)          |                   |
| Median    | .                | .                           | .              |                   |
| Q1; Q3    | .;. .            | .;. .                       | .;. .          |                   |
| Min; Max  | .;. .            | .;. .                       | .;. .          |                   |

\* Living patients at D28

## At bridging

|                             | NRM < D28<br>N=9 | Comparative group*<br>N=891 | Total<br>N=900 | Test: Probability                                   |
|-----------------------------|------------------|-----------------------------|----------------|-----------------------------------------------------|
| <b>Response to bridging</b> |                  |                             |                | Cochran-Mantel-Haenszel Row Mean Score<br>P = 0.217 |
| Complete Response           | 0 (0.0%)         | 69 (9.3%)                   | 69 (9.2%)      |                                                     |
| Partial Response            | 0 (0.0%)         | 174 (23.4%)                 | 174 (23.1%)    |                                                     |
| Stable Disease              | 1 (11.1%)        | 89 (11.9%)                  | 90 (11.9%)     |                                                     |
| Progressive Disease         | 8 (88.9%)        | 381 (51.1%)                 | 389 (51.6%)    |                                                     |
| Not Evaluated               | 0 (0.0%)         | 32 (4.3%)                   | 32 (4.2%)      |                                                     |
| (-)                         | 0                | 146                         | 146            |                                                     |

\* Living patients at D28

## At leukapheresis

|                                    | NRM < D28<br>N=9 | Comparative group*<br>N=891 | Total<br>N=900    | Test: Probability     |
|------------------------------------|------------------|-----------------------------|-------------------|-----------------------|
| <b>Hemoglobin (g/dL)</b>           |                  |                             |                   | Wilcoxon<br>P = 0.199 |
| N                                  | 8                | 863                         | 871               |                       |
| Missing                            | 1                | 28                          | 29                |                       |
| Mean (SD)                          | 10.54 (2.209)    | 11.38 (5.324)               | 11.37 (5.304)     |                       |
| Median                             | 10.05            | 11.00                       | 11.00             |                       |
| Q1; Q3                             | 9.8 ; 10.8       | 9.9 ; 12.2                  | 9.9 ; 12.2        |                       |
| Min; Max                           | 7.6 ; 15.4       | 0.7 ; 112.0                 | 0.7 ; 112.0       |                       |
| <b>Leukocytes (WBC) (G/L)</b>      |                  |                             |                   | Wilcoxon<br>P = 0.422 |
| N                                  | 8                | 863                         | 871               |                       |
| Missing                            | 1                | 28                          | 29                |                       |
| Mean (SD)                          | 5.874 (2.1229)   | 6.408 (17.9649)             | 6.403 (17.8832)   |                       |
| Median                             | 6.195            | 5.000                       | 5.000             |                       |
| Q1; Q3                             | 4.50 ; 7.60      | 3.50 ; 7.00                 | 3.56 ; 7.00       |                       |
| Min; Max                           | 2.00 ; 8.40      | 0.40 ; 519.00               | 0.40 ; 519.00     |                       |
| <b>Neutrophils (ANC/AGC) (G/L)</b> |                  |                             |                   | Wilcoxon<br>P = 0.663 |
| N                                  | 8                | 849                         | 857               |                       |
| Missing                            | 1                | 42                          | 43                |                       |
| Mean (SD)                          | 3.703 (1.9064)   | 4.236 (6.0329)              | 4.231 (6.0074)    |                       |
| Median                             | 4.250            | 3.200                       | 3.200             |                       |
| Q1; Q3                             | 2.50 ; 4.86      | 2.10 ; 5.00                 | 2.10 ; 5.00       |                       |
| Min; Max                           | 0.20 ; 6.20      | 0.00 ; 121.00               | 0.00 ; 121.00     |                       |
| <b>Lymphocytes (ALC) (G/L)</b>     |                  |                             |                   | Wilcoxon<br>P = 0.797 |
| N                                  | 8                | 844                         | 852               |                       |
| Missing                            | 1                | 47                          | 48                |                       |
| Mean (SD)                          | 0.854 (0.6354)   | 0.895 (0.7801)              | 0.895 (0.7786)    |                       |
| Median                             | 0.615            | 0.700                       | 0.700             |                       |
| Q1; Q3                             | 0.50 ; 0.95      | 0.50 ; 1.10                 | 0.50 ; 1.10       |                       |
| Min; Max                           | 0.40 ; 2.30      | 0.03 ; 13.40                | 0.03 ; 13.40      |                       |
| <b>Lymphocytes B (units/μL)</b>    |                  |                             |                   | Wilcoxon<br>P = -     |
| N                                  | 0                | 217                         | 217               |                       |
| Missing                            | 9                | 674                         | 683               |                       |
| Mean (SD)                          | . (.)            | 32.268 (176.4196)           | 32.268 (176.4196) |                       |
| Median                             | .                | 0.000                       | 0.000             |                       |
| Q1; Q3                             | . ; .            | 0.00 ; 0.00                 | 0.00 ; 0.00       |                       |
| Min; Max                           | . ; .            | 0.00 ; 2063.00              | 0.00 ; 2063.00    |                       |
| <b>Platelets (G/L)</b>             |                  |                             |                   | Wilcoxon<br>P = 0.652 |
| N                                  | 8                | 858                         | 866               |                       |
| Missing                            | 1                | 33                          | 34                |                       |
| Mean (SD)                          | 165.9 (83.59)    | 199.6 (135.41)              | 199.3 (135.03)    |                       |
| Median                             | 182.0            | 183.5                       | 183.5             |                       |
| Q1; Q3                             | 92 ; 239         | 121 ; 247                   | 121 ; 247         |                       |
| Min; Max                           | 45 ; 258         | 2 ; 1576                    | 2 ; 1576          |                       |
| <b>AST (SGOT) (IU/L)</b>           |                  |                             |                   | Wilcoxon<br>P = 0.680 |
| N                                  | 7                | 714                         | 721               |                       |
| Missing                            | 2                | 177                         | 179               |                       |
| Mean (SD)                          | 28.0 (10.65)     | 27.9 (18.89)                | 27.9 (18.83)      |                       |
| Median                             | 30.0             | 24.0                        | 24.0              |                       |
| Q1; Q3                             | 17 ; 37          | 19 ; 31                     | 19 ; 31           |                       |
| Min; Max                           | 17 ; 44          | 5 ; 277                     | 5 ; 277           |                       |
| <b>ALT (SGPT) (IU/L)</b>           |                  |                             |                   | Wilcoxon<br>P = 0.350 |
| N                                  | 7                | 717                         | 724               |                       |
| Missing                            | 2                | 174                         | 176               |                       |
| Mean (SD)                          | 20.4 (11.86)     | 26.9 (22.06)                | 26.8 (21.99)      |                       |
| Median                             | 18.0             | 22.0                        | 22.0              |                       |
| Q1; Q3                             | 10 ; 33          | 15 ; 31                     | 15 ; 31           |                       |
| Min; Max                           | 9 ; 39           | 4 ; 316                     | 4 ; 316           |                       |



|                                      | NRM < D28<br>N=9 | Comparative group*<br>N=891 | Total<br>N=900   | Test: Probability     |
|--------------------------------------|------------------|-----------------------------|------------------|-----------------------|
| <b>LDH (IU/L)</b>                    |                  |                             |                  | Wilcoxon<br>P = 0.513 |
| N                                    | 4                | 637                         | 641              |                       |
| Missing                              | 5                | 254                         | 259              |                       |
| Mean (SD)                            | 373.3 (168.25)   | 364.5 (266.18)              | 364.5 (265.60)   |                       |
| Median                               | 423.5            | 282.0                       | 282.0            |                       |
| Q1; Q3                               | 257 ; 490        | 218 ; 412                   | 218 ; 413        |                       |
| Min; Max                             | 135 ; 511        | 9 ; 2378                    | 9 ; 2378         |                       |
| <b>Serum creatinine (µmol/L)</b>     |                  |                             |                  | Wilcoxon<br>P = 0.161 |
| N                                    | 6                | 744                         | 750              |                       |
| Missing                              | 3                | 147                         | 150              |                       |
| Mean (SD)                            | 66.8 (30.29)     | 76.4 (29.85)                | 76.3 (29.85)     |                       |
| Median                               | 58.0             | 71.0                        | 71.0             |                       |
| Q1; Q3                               | 52 ; 69          | 60 ; 86                     | 60 ; 86          |                       |
| Min; Max                             | 39 ; 125         | 9 ; 377                     | 9 ; 377          |                       |
| <b>Creatinine clearance (mL/min)</b> |                  |                             |                  | Wilcoxon<br>P = 0.553 |
| N                                    | 6                | 731                         | 737              |                       |
| Missing                              | 3                | 160                         | 163              |                       |
| Mean (SD)                            | 91.2 (22.03)     | 88.3 (24.54)                | 88.4 (24.50)     |                       |
| Median                               | 96.5             | 90.0                        | 90.0             |                       |
| Q1; Q3                               | 83 ; 107         | 74 ; 100                    | 74 ; 100         |                       |
| Min; Max                             | 52 ; 112         | 5 ; 210                     | 5 ; 210          |                       |
| <b>C Reactive protein (mg/L)</b>     |                  |                             |                  | Wilcoxon<br>P = 0.328 |
| N                                    | 6                | 611                         | 617              |                       |
| Missing                              | 3                | 280                         | 283              |                       |
| Mean (SD)                            | 30.3 (26.48)     | 27.2 (43.38)                | 27.3 (43.23)     |                       |
| Median                               | 29.0             | 8.0                         | 8.0              |                       |
| Q1; Q3                               | 4 ; 46           | 3 ; 32                      | 3 ; 32           |                       |
| Min; Max                             | 3 ; 71           | 0 ; 289                     | 0 ; 289          |                       |
| <b>Ferritine (µg/L)</b>              |                  |                             |                  | Wilcoxon<br>P = 0.200 |
| N                                    | 1                | 314                         | 315              |                       |
| Missing                              | 8                | 577                         | 585              |                       |
| Mean (SD)                            | 1804.0 (.)       | 1079.9 (2903.39)            | 1082.2 (2899.05) |                       |
| Median                               | 1804.0           | 559.5                       | 560.0            |                       |
| Q1; Q3                               | 1804 ; 1804      | 238 ; 1106                  | 238 ; 1114       |                       |
| Min; Max                             | 1804 ; 1804      | 14 ; 44934                  | 14 ; 44934       |                       |
| <b>Fibrinogen (g/L)</b>              |                  |                             |                  | Wilcoxon<br>P = 0.100 |
| N                                    | 3                | 442                         | 445              |                       |
| Missing                              | 6                | 449                         | 455              |                       |
| Mean (SD)                            | 3.233 (1.1930)   | 4.620 (1.5771)              | 4.611 (1.5779)   |                       |
| Median                               | 2.700            | 4.300                       | 4.300            |                       |
| Q1; Q3                               | 2.40 ; 4.60      | 3.50 ; 5.50                 | 3.50 ; 5.40      |                       |
| Min; Max                             | 2.40 ; 4.60      | 0.83 ; 10.00                | 0.83 ; 10.00     |                       |
| <b>Gamma-GT (IU/L)</b>               |                  |                             |                  | Wilcoxon<br>P = 0.385 |
| N                                    | 7                | 670                         | 677              |                       |
| Missing                              | 2                | 221                         | 223              |                       |
| Mean (SD)                            | 74.7 (125.80)    | 67.1 (85.77)                | 67.2 (86.15)     |                       |
| Median                               | 31.0             | 38.0                        | 38.0             |                       |
| Q1; Q3                               | 21 ; 42          | 24 ; 74                     | 24 ; 74          |                       |
| Min; Max                             | 9 ; 359          | 4 ; 912                     | 4 ; 912          |                       |
| <b>Total bilirubin (µmol/L)</b>      |                  |                             |                  | Wilcoxon<br>P = 0.183 |
| N                                    | 7                | 665                         | 672              |                       |
| Missing                              | 2                | 226                         | 228              |                       |
| Mean (SD)                            | 8.6 (4.79)       | 7.0 (6.48)                  | 7.0 (6.46)       |                       |
| Median                               | 10.0             | 6.0                         | 6.0              |                       |
| Q1; Q3                               | 5 ; 12           | 4 ; 8                       | 4 ; 8            |                       |
| Min; Max                             | 1 ; 15           | 0 ; 123                     | 0 ; 123          |                       |

## At lymphodepletion

|                                                                      | NRM < D28        |          | Comparative group* |         | Total           |         | Test: Probability |                         |                |
|----------------------------------------------------------------------|------------------|----------|--------------------|---------|-----------------|---------|-------------------|-------------------------|----------------|
|                                                                      | N=9              |          | N=891              |         | N=900           |         |                   |                         |                |
| <b>Bulk &gt; 5cm</b>                                                 |                  |          |                    |         |                 |         |                   | Fisher                  | Exact          |
| No                                                                   | 5                | (62.5%)  | 649                | (73.6%) | 654             | (73.5%) | P = 0.443         |                         |                |
| Yes                                                                  | 3                | (37.5%)  | 233                | (26.4%) | 236             | (26.5%) |                   |                         |                |
| (-)                                                                  | 1                |          | 9                  |         | 10              |         |                   |                         |                |
| <b>ECOG</b>                                                          |                  |          |                    |         |                 |         |                   | Cochran-Mantel-Haenszel | Row Mean Score |
| Normal activities                                                    | 2                | (22.2%)  | 310                | (35.4%) | 312             | (35.3%) | P = 0.002         |                         |                |
| Ambulatory able to carry out work                                    | 2                | (22.2%)  | 400                | (45.7%) | 402             | (45.4%) |                   |                         |                |
| Ambulatory unable to carry out work                                  | 4                | (44.4%)  | 69                 | (7.9%)  | 73              | (8.2%)  |                   |                         |                |
| Confined to chair more than 50% of waking hours                      | 1                | (11.1%)  | 26                 | (3.0%)  | 27              | (3.1%)  |                   |                         |                |
| Totally confined to chair                                            | 0                | (0.0%)   | 6                  | (0.7%)  | 6               | (0.7%)  |                   |                         |                |
| Not Evaluated                                                        | 0                | (0.0%)   | 65                 | (7.4%)  | 65              | (7.3%)  |                   |                         |                |
| (-)                                                                  | 0                |          | 15                 |         | 15              |         |                   |                         |                |
| <b>ECOG **</b>                                                       |                  |          |                    |         |                 |         |                   | Fisher                  | Exact          |
| 0-1                                                                  | 4                | (44.4%)  | 732                | (87.5%) | 736             | (87.0%) | P = 0.003         |                         |                |
| >=2                                                                  | 5                | (55.6%)  | 105                | (12.5%) | 110             | (13.0%) |                   |                         |                |
| (-)                                                                  | 0                |          | 54                 |         | 54              |         |                   |                         |                |
| <b>Duration between last drug administration and lymphodepletion</b> |                  |          |                    |         |                 |         |                   | Wilcoxon                | P = 0.191      |
| N                                                                    | 9                |          | 817                |         | 826             |         |                   |                         |                |
| Missing                                                              | 0                |          | 74                 |         | 74              |         |                   |                         |                |
| Mean (SD)                                                            | 22.0 (15.41)     |          | 48.5 (107.76)      |         | 48.2 (107.22)   |         |                   |                         |                |
| Median                                                               | 24.0             |          | 27.0               |         | 27.0            |         |                   |                         |                |
| Q1; Q3                                                               | 13 ; 26          |          | 18 ; 37            |         | 18 ; 37         |         |                   |                         |                |
| Min; Max                                                             | 1 ; 52           |          | 1 ; 1498           |         | 1 ; 1498        |         |                   |                         |                |
| <b>Hypogammaglobulinemia</b>                                         |                  |          |                    |         |                 |         |                   | Fisher                  | Exact          |
| No                                                                   | 0                | (0.0%)   | 350                | (51.9%) | 350             | (51.6%) | P = 0.054         |                         |                |
| Yes                                                                  | 4                | (100.0%) | 324                | (48.1%) | 328             | (48.4%) |                   |                         |                |
| (-)                                                                  | 5                |          | 217                |         | 222             |         |                   |                         |                |
| <b>Hemoglobin (g/dL)</b>                                             |                  |          |                    |         |                 |         |                   | Wilcoxon                | P = 0.020      |
| N                                                                    | 8                |          | 868                |         | 876             |         |                   |                         |                |
| Missing                                                              | 1                |          | 23                 |         | 24              |         |                   |                         |                |
| Mean (SD)                                                            | 9.100 (1.9049)   |          | 11.248 (8.0007)    |         | 11.228 (7.9685) |         |                   |                         |                |
| Median                                                               | 9.100            |          | 10.450             |         | 10.400          |         |                   |                         |                |
| Q1; Q3                                                               | 8.00 ; 9.75      |          | 9.40 ; 11.60       |         | 9.40 ; 11.60    |         |                   |                         |                |
| Min; Max                                                             | 6.30 ; 12.80     |          | 2.45 ; 98.00       |         | 2.45 ; 98.00    |         |                   |                         |                |
| <b>Leukocytes (WBC) (G/L)</b>                                        |                  |          |                    |         |                 |         |                   | Wilcoxon                | P = 0.142      |
| N                                                                    | 8                |          | 866                |         | 874             |         |                   |                         |                |
| Missing                                                              | 1                |          | 25                 |         | 26              |         |                   |                         |                |
| Mean (SD)                                                            | 23.580 (48.1001) |          | 5.220 (12.5546)    |         | 5.388 (13.3336) |         |                   |                         |                |
| Median                                                               | 5.800            |          | 4.100              |         | 4.120           |         |                   |                         |                |
| Q1; Q3                                                               | 3.57 ; 12.95     |          | 3.00 ; 5.71        |         | 3.00 ; 5.80     |         |                   |                         |                |
| Min; Max                                                             | 2.00 ; 142.00    |          | 0.75 ; 363.00      |         | 0.75 ; 363.00   |         |                   |                         |                |
| <b>Neutrophils (ANC/AGC) (G/L)</b>                                   |                  |          |                    |         |                 |         |                   | Wilcoxon                | P = 0.204      |
| N                                                                    | 8                |          | 809                |         | 817             |         |                   |                         |                |
| Missing                                                              | 1                |          | 82                 |         | 83              |         |                   |                         |                |
| Mean (SD)                                                            | 5.515 (5.3528)   |          | 3.607 (10.8563)    |         | 3.625 (10.8160) |         |                   |                         |                |
| Median                                                               | 4.210            |          | 2.700              |         | 2.700           |         |                   |                         |                |
| Q1; Q3                                                               | 1.95 ; 6.80      |          | 1.70 ; 4.00        |         | 1.70 ; 4.08     |         |                   |                         |                |
| Min; Max                                                             | 0.80 ; 17.40     |          | 0.00 ; 303.00      |         | 0.00 ; 303.00   |         |                   |                         |                |
| <b>Lymphocytes (ALC) (G/L)</b>                                       |                  |          |                    |         |                 |         |                   | Wilcoxon                | P = 0.193      |
| N                                                                    | 8                |          | 790                |         | 798             |         |                   |                         |                |
| Missing                                                              | 1                |          | 101                |         | 102             |         |                   |                         |                |
| Mean (SD)                                                            | 17.415 (47.1094) |          | 0.763 (1.5785)     |         | 0.930 (4.9713)  |         |                   |                         |                |
| Median                                                               | 0.860            |          | 0.600              |         | 0.600           |         |                   |                         |                |
| Q1; Q3                                                               | 0.45 ; 1.30      |          | 0.30 ; 0.90        |         | 0.30 ; 0.90     |         |                   |                         |                |
| Min; Max                                                             | 0.10 ; 134.00    |          | 0.00 ; 38.00       |         | 0.00 ; 134.00   |         |                   |                         |                |

|                                                 | NRM < D28<br>N=9 | Comparative<br>group*<br>N=891 | Total<br>N=900  | Test: Probability            |
|-------------------------------------------------|------------------|--------------------------------|-----------------|------------------------------|
| <b>Lymphocytes B (units/<math>\mu</math>L)</b>  |                  |                                |                 | Wilcoxon<br>P = -            |
| N                                               | 0                | 210                            | 210             |                              |
| Missing                                         | 9                | 681                            | 690             |                              |
| Mean (SD)                                       | . (.)            | 3.749 (49.5653)                | 3.749 (49.5653) |                              |
| Median                                          | .                | 0.000                          | 0.000           |                              |
| Q1; Q3                                          | . ; .            | 0.00 ; 0.00                    | 0.00 ; 0.00     |                              |
| Min; Max                                        | . ; .            | 0.00 ; 717.00                  | 0.00 ; 717.00   |                              |
| <b>Platelets (G/L)</b>                          |                  |                                |                 | Wilcoxon<br>P = 0.639        |
| N                                               | 8                | 867                            | 875             |                              |
| Missing                                         | 1                | 24                             | 25              |                              |
| Mean (SD)                                       | 170.8 (105.23)   | 191.4 (99.00)                  | 191.2 (99.01)   |                              |
| Median                                          | 161.0            | 181.0                          | 181.0           |                              |
| Q1; Q3                                          | 99 ; 232         | 125 ; 240                      | 125 ; 240       |                              |
| Min; Max                                        | 32 ; 352         | 10 ; 678                       | 10 ; 678        |                              |
| <b>Platelets &gt; 50GL **</b>                   |                  |                                |                 | Fisher<br>P = 0.081<br>Exact |
| No                                              | 4 (57.1%)        | 211 (25.9%)                    | 215 (26.2%)     |                              |
| Yes                                             | 3 (42.9%)        | 603 (74.1%)                    | 606 (73.8%)     |                              |
| (-)                                             | 2                | 77                             | 79              |                              |
| <b>AST (SGOT) (IU/L)</b>                        |                  |                                |                 | Wilcoxon<br>P = 0.012        |
| N                                               | 5                | 836                            | 841             |                              |
| Missing                                         | 4                | 55                             | 59              |                              |
| Mean (SD)                                       | 196.0 (264.29)   | 27.1 (26.90)                   | 28.1 (34.94)    |                              |
| Median                                          | 68.0             | 22.0                           | 22.0            |                              |
| Q1; Q3                                          | 35 ; 210         | 17 ; 29                        | 17 ; 29         |                              |
| Min; Max                                        | 18 ; 649         | 3 ; 451                        | 3 ; 649         |                              |
| <b>ALT (SGPT) (IU/L)</b>                        |                  |                                |                 | Wilcoxon<br>P = 0.776        |
| N                                               | 5                | 840                            | 845             |                              |
| Missing                                         | 4                | 51                             | 55              |                              |
| Mean (SD)                                       | 71.6 (124.45)    | 27.3 (32.54)                   | 27.5 (33.73)    |                              |
| Median                                          | 18.0             | 20.0                           | 20.0            |                              |
| Q1; Q3                                          | 13 ; 24          | 14 ; 29                        | 14 ; 29         |                              |
| Min; Max                                        | 9 ; 294          | 0 ; 419                        | 0 ; 419         |                              |
| <b>LDH (IU/L)</b>                               |                  |                                |                 | Wilcoxon<br>P = 0.019        |
| N                                               | 7                | 784                            | 791             |                              |
| Missing                                         | 2                | 107                            | 109             |                              |
| Mean (SD)                                       | 1252.0 (2135.98) | 371.9 (1120.08)                | 379.7 (1133.54) |                              |
| Median                                          | 408.0            | 250.0                          | 250.0           |                              |
| Q1; Q3                                          | 242 ; 930        | 194 ; 361                      | 195 ; 364       |                              |
| Min; Max                                        | 238 ; 6066       | 46 ; 30600                     | 46 ; 30600      |                              |
| <b>LDH (IU/L) **</b>                            |                  |                                |                 | Fisher<br>P = 0.116<br>Exact |
| Normal                                          | 1 (11.1%)        | 375 (44.2%)                    | 376 (43.8%)     |                              |
| > Upper limit                                   | 8 (88.9%)        | 440 (51.8%)                    | 448 (52.2%)     |                              |
| Not done                                        | 0 (0.0%)         | 34 (4.0%)                      | 34 (4.0%)       |                              |
| (-)                                             | 0                | 42                             | 42              |                              |
| <b>Serum creatinine (<math>\mu</math>mol/L)</b> |                  |                                |                 | Wilcoxon<br>P = 0.361        |
| N                                               | 8                | 856                            | 864             |                              |
| Missing                                         | 1                | 35                             | 36              |                              |
| Mean (SD)                                       | 67.9 (26.04)     | 75.1 (31.51)                   | 75.1 (31.46)    |                              |
| Median                                          | 59.0             | 70.0                           | 70.0            |                              |
| Q1; Q3                                          | 48 ; 90          | 57 ; 84                        | 57 ; 84         |                              |
| Min; Max                                        | 40 ; 109         | 26 ; 516                       | 26 ; 516        |                              |
| <b>Creatinine clearance (mL/min)</b>            |                  |                                |                 | Wilcoxon<br>P = 0.452        |
| N                                               | 7                | 827                            | 834             |                              |
| Missing                                         | 2                | 64                             | 66              |                              |
| Mean (SD)                                       | 95.6 (27.17)     | 89.1 (24.57)                   | 89.2 (24.58)    |                              |
| Median                                          | 92.0             | 90.0                           | 90.0            |                              |
| Q1; Q3                                          | 64 ; 124         | 76 ; 100                       | 76 ; 100        |                              |
| Min; Max                                        | 61 ; 131         | 10 ; 225                       | 10 ; 225        |                              |

|                                     | NRM < D28<br>N=9 | Comparative<br>group*<br>N=891 | Total<br>N=900  | Test: Probability            |
|-------------------------------------|------------------|--------------------------------|-----------------|------------------------------|
| <b>C Reactive protein (mg/L)</b>    |                  |                                |                 | Wilcoxon<br>P = 0.116        |
| N                                   | 7                | 780                            | 787             |                              |
| Missing                             | 2                | 111                            | 113             |                              |
| Mean (SD)                           | 47.6 (56.68)     | 23.5 (40.04)                   | 23.7 (40.23)    |                              |
| Median                              | 29.0             | 7.0                            | 7.0             |                              |
| Q1; Q3                              | 5 ; 114          | 3 ; 26                         | 3 ; 27          |                              |
| Min; Max                            | 4 ; 142          | 0 ; 327                        | 0 ; 327         |                              |
| <b>C Reactive protein (mg/L) **</b> |                  |                                |                 | Fisher<br>P = 0.061<br>Exact |
| <= 30 mg/L                          | 4 (50.0%)        | 666 (75.9%)                    | 670 (75.6%)     |                              |
| > 30 mg/L                           | 3 (37.5%)        | 191 (21.8%)                    | 194 (21.9%)     |                              |
| Not done                            | 1 (12.5%)        | 21 (2.4%)                      | 22 (2.5%)       |                              |
| (-)                                 | 1                | 13                             | 14              |                              |
| <b>Ferritine (µg/L)</b>             |                  |                                |                 | Wilcoxon<br>P = 0.021        |
| N                                   | 5                | 628                            | 633             |                              |
| Missing                             | 4                | 263                            | 267             |                              |
| Mean (SD)                           | 7732.0 (9697.22) | 883.3 (1553.11)                | 937.4 (1832.05) |                              |
| Median                              | 1837.0           | 479.5                          | 481.0           |                              |
| Q1; Q3                              | 986 ; 13342      | 201 ; 937                      | 204 ; 952       |                              |
| Min; Max                            | 300 ; 22195      | 5 ; 16403                      | 5 ; 22195       |                              |
| <b>Ferritine (µg/L) **</b>          |                  |                                |                 | Fisher<br>P = 0.068<br>Exact |
| Normal                              | 1 (12.5%)        | 227 (27.0%)                    | 228 (26.8%)     |                              |
| > Upper limit                       | 4 (50.0%)        | 529 (62.8%)                    | 533 (62.7%)     |                              |
| Not done                            | 3 (37.5%)        | 86 (10.2%)                     | 89 (10.5%)      |                              |
| (-)                                 | 1                | 49                             | 50              |                              |
| <b>Fibrinogen (g/L)</b>             |                  |                                |                 | Wilcoxon<br>P = 0.166        |
| N                                   | 6                | 528                            | 534             |                              |
| Missing                             | 3                | 363                            | 366             |                              |
| Mean (SD)                           | 3.500 (1.8210)   | 4.182 (1.3558)                 | 4.174 (1.3616)  |                              |
| Median                              | 3.300            | 4.000                          | 3.950           |                              |
| Q1; Q3                              | 2.10 ; 3.80      | 3.20 ; 5.00                    | 3.20 ; 5.00     |                              |
| Min; Max                            | 1.70 ; 6.80      | 0.80 ; 10.00                   | 0.80 ; 10.00    |                              |
| <b>Gamma-GT (IU/L)</b>              |                  |                                |                 | Wilcoxon<br>P = 0.111        |
| N                                   | 5                | 782                            | 787             |                              |
| Missing                             | 4                | 109                            | 113             |                              |
| Mean (SD)                           | 91.4 (68.78)     | 64.9 (92.65)                   | 65.0 (92.51)    |                              |
| Median                              | 59.0             | 36.0                           | 36.0            |                              |
| Q1; Q3                              | 35 ; 142         | 22 ; 67                        | 23 ; 67         |                              |
| Min; Max                            | 35 ; 186         | 3 ; 983                        | 3 ; 983         |                              |
| <b>Total bilirubin (µmol/L)</b>     |                  |                                |                 | Wilcoxon<br>P = 0.035        |
| N                                   | 5                | 821                            | 826             |                              |
| Missing                             | 4                | 70                             | 74              |                              |
| Mean (SD)                           | 12.6 (7.83)      | 7.4 (16.32)                    | 7.5 (16.28)     |                              |
| Median                              | 10.0             | 6.0                            | 6.0             |                              |
| Q1; Q3                              | 7 ; 17           | 4 ; 8                          | 4 ; 8           |                              |
| Min; Max                            | 5 ; 24           | 0 ; 446                        | 0 ; 446         |                              |
| <b>CAR-HEMATOTOX</b>                |                  |                                |                 | Fisher<br>P = 0.039<br>Exact |
| Low                                 | 2 (22.2%)        | 522 (58.7%)                    | 524 (58.3%)     |                              |
| High                                | 7 (77.8%)        | 368 (41.3%)                    | 375 (41.7%)     |                              |
| (-)                                 | 0                | 1                              | 1               |                              |
| <b>EASIX score</b>                  |                  |                                |                 | Wilcoxon<br>P = 0.141        |
| N                                   | 7                | 773                            | 780             |                              |
| Missing                             | 2                | 118                            | 120             |                              |
| Mean (SD)                           | 135.6 (277.32)   | 70.1 (1408.75)                 | 70.7 (1402.63)  |                              |
| Median                              | 19.6             | 10.9                           | 10.9            |                              |
| Q1; Q3                              | 6 ; 118          | 7 ; 19                         | 6 ; 19          |                              |
| Min; Max                            | 4 ; 758          | 1 ; 39168                      | 1 ; 39168       |                              |

|                               | NRM < D28<br>N=9 | Comparative<br>group*<br>N=891 | Total<br>N=900 | Test: Probability                                      |
|-------------------------------|------------------|--------------------------------|----------------|--------------------------------------------------------|
| <b>Simplified EASIX score</b> |                  |                                |                | Wilcoxon<br>P = 0.107                                  |
| N                             | 7                | 782                            | 789            |                                                        |
| Missing                       | 2                | 109                            | 111            |                                                        |
| Mean (SD)                     | 31.7 (70.04)     | 6.7 (109.58)                   | 6.9 (109.29)   |                                                        |
| Median                        | 2.2              | 1.5                            | 1.5            |                                                        |
| Q1; Q3                        | 1 ; 23           | 1 ; 3                          | 1 ; 3          |                                                        |
| Min; Max                      | 1 ; 190          | 0 ; 3060                       | 0 ; 3060       |                                                        |
| <b>Modified EASIX score</b>   |                  |                                |                | Wilcoxon<br>P = 0.202                                  |
| N                             | 6                | 715                            | 721            |                                                        |
| Missing                       | 3                | 176                            | 179            |                                                        |
| Mean (SD)                     | 145.5 (248.11)   | 14.4 (149.62)                  | 15.5 (150.89)  |                                                        |
| Median                        | 3.3              | 1.2                            | 1.2            |                                                        |
| Q1; Q3                        | 1 ; 259          | 0 ; 5                          | 0 ; 5          |                                                        |
| Min; Max                      | 0 ; 607          | 0 ; 3909                       | 0 ; 3909       |                                                        |
| <b>EASIX-F score</b>          |                  |                                |                | Cochran-Mantel-Haenszel<br>Row Mean Score<br>P = 0.495 |
| High risk                     | 2 (40.0%)        | 147 (26.4%)                    | 149 (26.6%)    |                                                        |
| Low risk                      | 3 (60.0%)        | 409 (73.6%)                    | 412 (73.4%)    |                                                        |
| (-)                           | 4                | 335                            | 339            |                                                        |
| <b>EASIX-FC score</b>         |                  |                                |                | Cochran-Mantel-Haenszel<br>Row Mean Score<br>P = -     |
| Low risk                      | 3 (100.0%)       | 335 (100.0%)                   | 338 (100.0%)   |                                                        |
| (-)                           | 6                | 556                            | 562            |                                                        |

## At infusion

|                                                 | NRM < D28<br>N=9 |         | Comparative group*<br>N=891 |         | Total<br>N=900   |         | Test:<br>Probability                                |
|-------------------------------------------------|------------------|---------|-----------------------------|---------|------------------|---------|-----------------------------------------------------|
| <b>CAR-T product</b>                            |                  |         |                             |         |                  |         |                                                     |
| Tisagenlecleucel-KYMRIAH                        | 5                | (55.6%) | 337                         | (37.9%) | 342              | (38.0%) | Fisher Exact<br>P = 0.313                           |
| Axicabtagene ciloleucel-YESCARTA                | 4                | (44.4%) | 553                         | (62.1%) | 557              | (62.0%) |                                                     |
| (-)                                             | 0                |         | 1                           |         | 1                |         |                                                     |
| <b>ECOG</b>                                     |                  |         |                             |         |                  |         |                                                     |
| Normal activities                               | 3                | (33.3%) | 262                         | (30.6%) | 265              | (30.6%) | Cochran-Mantel-Haenszel Row Mean Score<br>P = 0.441 |
| Ambulatory able to carry out work               | 2                | (22.2%) | 372                         | (43.4%) | 374              | (43.2%) |                                                     |
| Ambulatory unable to carry out work             | 2                | (22.2%) | 82                          | (9.6%)  | 84               | (9.7%)  |                                                     |
| Confined to chair more than 50% of waking hours | 1                | (11.1%) | 23                          | (2.7%)  | 24               | (2.8%)  |                                                     |
| Totally confined to chair                       | 0                | (0.0%)  | 8                           | (0.9%)  | 8                | (0.9%)  |                                                     |
| Not Evaluated                                   | 1                | (11.1%) | 110                         | (12.8%) | 111              | (12.8%) |                                                     |
| (-)                                             | 0                |         | 34                          |         | 34               |         |                                                     |
| <b>Hemoglobin (g/dL)</b>                        |                  |         |                             |         |                  |         |                                                     |
| N                                               | 9                |         | 881                         |         | 890              |         | Wilcoxon<br>P = 0.059                               |
| Missing                                         | 0                |         | 10                          |         | 10               |         |                                                     |
| Mean (SD)                                       | 8.98 (1.039)     |         | 10.54 (7.360)               |         | 10.52 (7.325)    |         |                                                     |
| Median                                          | 8.90             |         | 9.70                        |         | 9.70             |         |                                                     |
| Q1; Q3                                          | 8.2 ; 9.4        |         | 8.8 ; 10.9                  |         | 8.7 ; 10.9       |         |                                                     |
| Min; Max                                        | 7.8 ; 11.0       |         | 2.6 ; 100.0                 |         | 2.6 ; 100.0      |         |                                                     |
| <b>Leukocytes (WBC) (G/L)</b>                   |                  |         |                             |         |                  |         |                                                     |
| N                                               | 9                |         | 880                         |         | 889              |         | Wilcoxon<br>P = 0.470                               |
| Missing                                         | 0                |         | 11                          |         | 11               |         |                                                     |
| Mean (SD)                                       | 1.851 (1.6869)   |         | 2.308 (4.4095)              |         | 2.303 (4.3903)   |         |                                                     |
| Median                                          | 1.500            |         | 1.805                       |         | 1.800            |         |                                                     |
| Q1; Q3                                          | 0.24 ; 2.90      |         | 1.01 ; 2.90                 |         | 1.00 ; 2.90      |         |                                                     |
| Min; Max                                        | 0.01 ; 4.50      |         | 0.00 ; 124.00               |         | 0.00 ; 124.00    |         |                                                     |
| <b>Neutrophils (ANC/AGC) (G/L)</b>              |                  |         |                             |         |                  |         |                                                     |
| N                                               | 8                |         | 824                         |         | 832              |         | Wilcoxon<br>P = 0.710                               |
| Missing                                         | 1                |         | 67                          |         | 68               |         |                                                     |
| Mean (SD)                                       | 2.491 (2.6288)   |         | 1.925 (2.0926)              |         | 1.930 (2.0972)   |         |                                                     |
| Median                                          | 1.600            |         | 1.505                       |         | 1.505            |         |                                                     |
| Q1; Q3                                          | 0.62 ; 3.80      |         | 0.89 ; 2.60                 |         | 0.89 ; 2.60      |         |                                                     |
| Min; Max                                        | 0.00 ; 7.90      |         | 0.00 ; 41.40                |         | 0.00 ; 41.40     |         |                                                     |
| <b>Lymphocytes (ALC) (G/L)</b>                  |                  |         |                             |         |                  |         |                                                     |
| N                                               | 8                |         | 804                         |         | 812              |         | Wilcoxon<br>P = 0.055                               |
| Missing                                         | 1                |         | 87                          |         | 88               |         |                                                     |
| Mean (SD)                                       | 0.7800 (1.09899) |         | 0.2294 (1.64995)            |         | 0.2348 (1.64586) |         |                                                     |
| Median                                          | 0.2000           |         | 0.0200                      |         | 0.0200           |         |                                                     |
| Q1; Q3                                          | 0.020 ; 1.450    |         | 0.000 ; 0.100               |         | 0.000 ; 0.100    |         |                                                     |
| Min; Max                                        | 0.000 ; 2.900    |         | 0.000 ; 32.400              |         | 0.000 ; 32.400   |         |                                                     |
| <b>Lymphocytes B (units/μL)</b>                 |                  |         |                             |         |                  |         |                                                     |
| N                                               | 0                |         | 270                         |         | 270              |         | Wilcoxon<br>P = -                                   |
| Missing                                         | 9                |         | 621                         |         | 630              |         |                                                     |
| Mean (SD)                                       | . (.)            |         | 0.024 (0.2113)              |         | 0.024 (0.2113)   |         |                                                     |
| Median                                          | .                |         | 0.000                       |         | 0.000            |         |                                                     |
| Q1; Q3                                          | . ; .            |         | 0.00 ; 0.00                 |         | 0.00 ; 0.00      |         |                                                     |
| Min; Max                                        | . ; .            |         | 0.00 ; 3.00                 |         | 0.00 ; 3.00      |         |                                                     |

|                                        | NRM < D28<br>N=9 | Comparative group*<br>N=891 | Total<br>N=900   | Test:<br>Probability  |
|----------------------------------------|------------------|-----------------------------|------------------|-----------------------|
| <b>Platelets (G/L)</b>                 |                  |                             |                  | Wilcoxon<br>P = 0.035 |
| N                                      | 9                | 881                         | 890              |                       |
| Missing                                | 0                | 10                          | 10               |                       |
| Mean (SD)                              | 94.8 (67.29)     | 157.0 (85.64)               | 156.3 (85.67)    |                       |
| Median                                 | 90.0             | 148.0                       | 147.0            |                       |
| Q1; Q3                                 | 36 ; 154         | 99 ; 202                    | 98 ; 201         |                       |
| Min; Max                               | 7 ; 173          | 0 ; 668                     | 0 ; 668          |                       |
| <b>Hemoglobin (g/dL)</b>               |                  |                             |                  | Wilcoxon<br>P = 0.059 |
| N                                      | 9                | 881                         | 890              |                       |
| Missing                                | 0                | 10                          | 10               |                       |
| Mean (SD)                              | 8.98 (1.039)     | 10.54 (7.360)               | 10.52 (7.325)    |                       |
| Median                                 | 8.90             | 9.70                        | 9.70             |                       |
| Q1; Q3                                 | 8.2 ; 9.4        | 8.8 ; 10.9                  | 8.7 ; 10.9       |                       |
| Min; Max                               | 7.8 ; 11.0       | 2.6 ; 100.0                 | 2.6 ; 100.0      |                       |
| <b>Leukocytes (WBC)<br/>(G/L)</b>      |                  |                             |                  | Wilcoxon<br>P = 0.470 |
| N                                      | 9                | 880                         | 889              |                       |
| Missing                                | 0                | 11                          | 11               |                       |
| Mean (SD)                              | 1.851 (1.6869)   | 2.308 (4.4095)              | 2.303 (4.3903)   |                       |
| Median                                 | 1.500            | 1.805                       | 1.800            |                       |
| Q1; Q3                                 | 0.24 ; 2.90      | 1.01 ; 2.90                 | 1.00 ; 2.90      |                       |
| Min; Max                               | 0.01 ; 4.50      | 0.00 ; 124.00               | 0.00 ; 124.00    |                       |
| <b>Neutrophils<br/>(ANC/AGC) (G/L)</b> |                  |                             |                  | Wilcoxon<br>P = 0.710 |
| N                                      | 8                | 824                         | 832              |                       |
| Missing                                | 1                | 67                          | 68               |                       |
| Mean (SD)                              | 2.491 (2.6288)   | 1.925 (2.0926)              | 1.930 (2.0972)   |                       |
| Median                                 | 1.600            | 1.505                       | 1.505            |                       |
| Q1; Q3                                 | 0.62 ; 3.80      | 0.89 ; 2.60                 | 0.89 ; 2.60      |                       |
| Min; Max                               | 0.00 ; 7.90      | 0.00 ; 41.40                | 0.00 ; 41.40     |                       |
| <b>Lymphocytes (ALC)<br/>(G/L)</b>     |                  |                             |                  | Wilcoxon<br>P = 0.055 |
| N                                      | 8                | 804                         | 812              |                       |
| Missing                                | 1                | 87                          | 88               |                       |
| Mean (SD)                              | 0.7800 (1.09899) | 0.2294 (1.64995)            | 0.2348 (1.64586) |                       |
| Median                                 | 0.2000           | 0.0200                      | 0.0200           |                       |
| Q1; Q3                                 | 0.020 ; 1.450    | 0.000 ; 0.100               | 0.000 ; 0.100    |                       |
| Min; Max                               | 0.000 ; 2.900    | 0.000 ; 32.400              | 0.000 ; 32.400   |                       |
| <b>Lymphocytes B<br/>(units/μL)</b>    |                  |                             |                  | Wilcoxon<br>P = -     |
| N                                      | 0                | 270                         | 270              |                       |
| Missing                                | 9                | 621                         | 630              |                       |
| Mean (SD)                              | . (.)            | 0.024 (0.2113)              | 0.024 (0.2113)   |                       |
| Median                                 | .                | 0.000                       | 0.000            |                       |
| Q1; Q3                                 | . ; .            | 0.00 ; 0.00                 | 0.00 ; 0.00      |                       |
| Min; Max                               | . ; .            | 0.00 ; 3.00                 | 0.00 ; 3.00      |                       |
| <b>Platelets (G/L)</b>                 |                  |                             |                  | Wilcoxon<br>P = 0.035 |
| N                                      | 9                | 881                         | 890              |                       |
| Missing                                | 0                | 10                          | 10               |                       |
| Mean (SD)                              | 94.8 (67.29)     | 157.0 (85.64)               | 156.3 (85.67)    |                       |
| Median                                 | 90.0             | 148.0                       | 147.0            |                       |
| Q1; Q3                                 | 36 ; 154         | 99 ; 202                    | 98 ; 201         |                       |
| Min; Max                               | 7 ; 173          | 0 ; 668                     | 0 ; 668          |                       |
| <b>AST (SGOT) (IU/L)</b>               |                  |                             |                  | Wilcoxon<br>P = 0.056 |
| N                                      | 9                | 877                         | 886              |                       |
| Missing                                | 0                | 14                          | 14               |                       |
| Mean (SD)                              | 45.8 (34.39)     | 24.8 (16.07)                | 25.0 (16.46)     |                       |
| Median                                 | 39.0             | 21.0                        | 21.0             |                       |
| Q1; Q3                                 | 24 ; 65          | 16 ; 28                     | 16 ; 28          |                       |
| Min; Max                               | 8 ; 102          | 5 ; 205                     | 5 ; 205          |                       |

|                                      | NRM < D28<br>N=9            | Comparative group*<br>N=891 | Total<br>N=900            | Test:<br>Probability  |
|--------------------------------------|-----------------------------|-----------------------------|---------------------------|-----------------------|
| <b>ALT (SGPT) (IU/L)</b>             |                             |                             |                           | Wilcoxon<br>P = 0.690 |
| N                                    | 9                           | 877                         | 886                       |                       |
| Missing                              | 0                           | 14                          | 14                        |                       |
| Mean (SD)                            | 39.8 (53.27)                | 23.2 (24.63)                | 23.4 (25.08)              |                       |
| Median                               | 14.0                        | 17.0                        | 17.0                      |                       |
| Q1; Q3                               | 13 ; 25                     | 12 ; 25                     | 12 ; 25                   |                       |
| Min; Max                             | 5 ; 146                     | 0 ; 302                     | 0 ; 302                   |                       |
| <b>LDH (IU/L)</b>                    |                             |                             |                           | Wilcoxon<br>P = 0.021 |
| N                                    | 9                           | 841                         | 850                       |                       |
| Missing                              | 0                           | 50                          | 50                        |                       |
| Mean (SD)                            | 608.2 (748.56)              | 329.6 (797.83)              | 332.6 (797.42)            |                       |
| Median                               | 354.0                       | 221.0                       | 221.0                     |                       |
| Q1; Q3                               | 265 ; 527                   | 178 ; 312                   | 178 ; 313                 |                       |
| Min; Max                             | 164 ; 2560                  | 60 ; 21801                  | 60 ; 21801                |                       |
| <b>Serum creatinine (µmol/L)</b>     |                             |                             |                           | Wilcoxon<br>P = 0.572 |
| N                                    | 9                           | 882                         | 891                       |                       |
| Missing                              | 0                           | 9                           | 9                         |                       |
| Mean (SD)                            | 62.3 (23.05)                | 68.1 (36.66)                | 68.0 (36.54)              |                       |
| Median                               | 55.0                        | 62.0                        | 62.0                      |                       |
| Q1; Q3                               | 53 ; 87                     | 51 ; 76                     | 51 ; 76                   |                       |
| Min; Max                             | 30 ; 97                     | 24 ; 765                    | 24 ; 765                  |                       |
| <b>Creatinine clearance (mL/min)</b> |                             |                             |                           | Wilcoxon<br>P = 0.991 |
| N                                    | 8                           | 856                         | 864                       |                       |
| Missing                              | 1                           | 35                          | 36                        |                       |
| Mean (SD)                            | 94.1 (23.39)                | 98.1 (35.21)                | 98.1 (35.11)              |                       |
| Median                               | 97.0                        | 94.0                        | 94.0                      |                       |
| Q1; Q3                               | 80 ; 106                    | 86 ; 108                    | 86 ; 108                  |                       |
| Min; Max                             | 56 ; 132                    | 6 ; 753                     | 6 ; 753                   |                       |
| <b>C Reactive protein (mg/L)</b>     |                             |                             |                           | Wilcoxon<br>P = 0.087 |
| N                                    | 7                           | 866                         | 873                       |                       |
| Missing                              | 2                           | 25                          | 27                        |                       |
| Mean (SD)                            | 41.51 (25.324)              | 32.66 (51.266)              | 32.73 (51.109)            |                       |
| Median                               | 49.00                       | 12.00                       | 12.00                     |                       |
| Q1; Q3                               | 17.0 ; 52.0                 | 5.0 ; 37.0                  | 5.0 ; 38.0                |                       |
| Min; Max                             | 3.6 ; 81.0                  | 0.0 ; 391.0                 | 0.0 ; 391.0               |                       |
| <b>Ferritine (µg/L)</b>              |                             |                             |                           | Wilcoxon<br>P = 0.002 |
| N                                    | 6                           | 828                         | 834                       |                       |
| Missing                              | 3                           | 63                          | 66                        |                       |
| Mean (SD)                            | 77504.66667 (159025.757725) | 1326.66159 (2559.042775)    | 1874.70480 (14134.908668) |                       |
| Median                               | 6686.00000                  | 687.50000                   | 689.00000                 |                       |
| Q1; Q3                               | 2397.0000 ; 48614.0000      | 327.0000 ; 1308.5000        | 329.0000 ; 1327.0000      |                       |
| Min; Max                             | 645.0000 ; 400000.0000      | 1.7998 ; 37191.0000         | 1.7998 ; 400000.0000      |                       |
| <b>Fibrinogen (g/L)</b>              |                             |                             |                           | Wilcoxon<br>P = 0.144 |
| N                                    | 7                           | 722                         | 729                       |                       |
| Missing                              | 2                           | 169                         | 171                       |                       |
| Mean (SD)                            | 3.433 (2.2358)              | 4.239 (1.4702)              | 4.232 (1.4792)            |                       |
| Median                               | 2.600                       | 4.000                       | 4.000                     |                       |
| Q1; Q3                               | 1.80 ; 6.43                 | 3.30 ; 5.00                 | 3.30 ; 5.00               |                       |
| Min; Max                             | 0.80 ; 6.50                 | 0.50 ; 10.00                | 0.50 ; 10.00              |                       |
| <b>Gamma-GT (IU/L)</b>               |                             |                             |                           | Wilcoxon<br>P = 0.173 |
| N                                    | 9                           | 827                         | 836                       |                       |
| Missing                              | 0                           | 64                          | 64                        |                       |
| Mean (SD)                            | 125.6 (169.08)              | 68.9 (88.68)                | 69.5 (89.93)              |                       |
| Median                               | 57.0                        | 39.0                        | 39.0                      |                       |
| Q1; Q3                               | 33 ; 73                     | 24 ; 77                     | 24 ; 77                   |                       |
| Min; Max                             | 19 ; 527                    | 5 ; 887                     | 5 ; 887                   |                       |

\* Living patients at D28



|                                 | NRM < D28<br>N=9 |          | Comparative group*<br>N=891 |          | Total<br>N=900 |          | Test:<br>Probability                                           |
|---------------------------------|------------------|----------|-----------------------------|----------|----------------|----------|----------------------------------------------------------------|
| <b>Total bilirubin (µmol/L)</b> |                  |          |                             |          |                |          |                                                                |
| N                               | 9                |          | 873                         |          | 882            |          | Wilcoxon<br>P = 0.001                                          |
| Missing                         | 0                |          | 18                          |          | 18             |          |                                                                |
| Mean (SD)                       | 16.11 (7.236)    |          | 9.12 (7.709)                |          | 9.19 (7.732)   |          |                                                                |
| Median                          | 15.00            |          | 8.00                        |          | 8.00           |          |                                                                |
| Q1; Q3                          | 11.0 ; 23.0      |          | 6.0 ; 11.0                  |          | 6.0 ; 11.0     |          |                                                                |
| Min; Max                        | 5.0 ; 26.0       |          | 0.0 ; 153.0                 |          | 0.0 ; 153.0    |          |                                                                |
| <b>EASIX score</b>              |                  |          |                             |          |                |          |                                                                |
| N                               | 9                |          | 837                         |          | 846            |          | Wilcoxon<br>P = 0.005                                          |
| Missing                         | 0                |          | 54                          |          | 54             |          |                                                                |
| Mean (SD)                       | 70.2 (64.57)     |          | 38.6 (498.27)               |          | 38.9 (495.66)  |          |                                                                |
| Median                          | 45.4             |          | 10.4                        |          | 10.4           |          |                                                                |
| Q1; Q3                          | 25 ; 129         |          | 7 ; 19                      |          | 7 ; 19         |          |                                                                |
| Min; Max                        | 6 ; 170          |          | 1 ; 14352                   |          | 1 ; 14352      |          |                                                                |
| <b>Simplified EASIX score</b>   |                  |          |                             |          |                |          |                                                                |
| N                               | 9                |          | 838                         |          | 847            |          | Wilcoxon<br>P = 0.002                                          |
| Missing                         | 0                |          | 53                          |          | 53             |          |                                                                |
| Mean (SD)                       | 13.7 (17.16)     |          | 4.4 (32.82)                 |          | 4.5 (32.70)    |          |                                                                |
| Median                          | 4.7              |          | 1.6                         |          | 1.6            |          |                                                                |
| Q1; Q3                          | 4 ; 15           |          | 1 ; 3                       |          | 1 ; 3          |          |                                                                |
| Min; Max                        | 1 ; 53           |          | 0 ; 908                     |          | 0 ; 908        |          |                                                                |
| <b>Modified EASIX score</b>     |                  |          |                             |          |                |          |                                                                |
| N                               | 7                |          | 826                         |          | 833            |          | Wilcoxon<br>P = 0.018                                          |
| Missing                         | 2                |          | 65                          |          | 67             |          |                                                                |
| Mean (SD)                       | 84.6 (153.17)    |          | 51.3 (740.18)               |          | 51.6 (737.18)  |          |                                                                |
| Median                          | 24.3             |          | 2.1                         |          | 2.1            |          |                                                                |
| Q1; Q3                          | 2 ; 74           |          | 1 ; 8                       |          | 1 ; 9          |          |                                                                |
| Min; Max                        | 1 ; 427          |          | 0 ; 19803                   |          | 0 ; 19803      |          |                                                                |
| <b>EASIX-F score</b>            |                  |          |                             |          |                |          |                                                                |
| High risk                       | 3                | (60.0%)  | 254                         | (32.3%)  | 257            | (32.5%)  | Cochran-<br>Mantel-<br>Haenszel Row<br>Mean Score<br>P = 0.188 |
| Low risk                        | 2                | (40.0%)  | 532                         | (67.7%)  | 534            | (67.5%)  |                                                                |
| (-)                             | 4                |          | 105                         |          | 109            |          |                                                                |
| <b>EASIX-FC score</b>           |                  |          |                             |          |                |          |                                                                |
| Low risk                        | 2                | (100.0%) | 400                         | (100.0%) | 402            | (100.0%) | Cochran-<br>Mantel-<br>Haenszel Row<br>Mean Score<br>P = -     |
| (-)                             | 7                |          | 491                         |          | 498            |          |                                                                |

\* Living patients at D28

#### S4. Risk factors for overall NRM - univariate analysis

Risk factors for overall NRM were identified by comparing the characteristics of overall NRM population with patients alive at 1 year following CAR T-cell infusion.

### Patients characteristics

|                                               | NRM<br>N=48   | Comparative group*<br>N=191 | Total<br>N=239 | Test: Probability         |
|-----------------------------------------------|---------------|-----------------------------|----------------|---------------------------|
| <b>Sex</b>                                    |               |                             |                | Fisher Exact<br>P = 0.332 |
| Male                                          | 29 (60.4%)    | 98 (51.3%)                  | 127 (53.1%)    |                           |
| Female                                        | 19 (39.6%)    | 93 (48.7%)                  | 112 (46.9%)    |                           |
| <b>Age at first infusion</b>                  |               |                             |                | Wilcoxon<br>P = 0.003     |
| N                                             | 48            | 191                         | 239            |                           |
| Missing                                       | 0             | 0                           | 0              |                           |
| Mean (SD)                                     | 65.85 (9.906) | 59.79 (13.111)              | 61.00 (12.749) |                           |
| Median                                        | 67.00         | 63.00                       | 64.00          |                           |
| Q1; Q3                                        | 61.5 ; 73.5   | 52.0 ; 70.0                 | 54.0 ; 71.0    |                           |
| Min; Max                                      | 30.0 ; 79.0   | 23.0 ; 80.0                 | 23.0 ; 80.0    |                           |
| <b>BMI</b>                                    |               |                             |                | Wilcoxon<br>P = 0.108     |
| N                                             | 47            | 189                         | 236            |                           |
| Missing                                       | 1             | 2                           | 3              |                           |
| Mean (SD)                                     | 26.5 (5.92)   | 29.3 (44.75)                | 28.7 (40.13)   |                           |
| Median                                        | 26.0          | 24.2                        | 24.3           |                           |
| Q1; Q3                                        | 22 ; 29       | 22 ; 27                     | 22 ; 28        |                           |
| Min; Max                                      | 18 ; 47       | 15 ; 569                    | 15 ; 569       |                           |
| <b>Pathological diagnosis at registration</b> |               |                             |                |                           |
| DLBCL                                         | 30 (62.5%)    | 139 (72.8%)                 | 169 (70.7%)    |                           |
| DLBCL, NOS                                    | 30 (62.5%)    | 134 (70.2%)                 | 164 (68.6%)    |                           |
| DLBCL post PCNSL                              | 0 (0.0%)      | 1 (0.5%)                    | 1 (0.4%)       |                           |
| DLBCL, leg type                               | 0 (0.0%)      | 0 (0.0%)                    | 0 (0.0%)       |                           |
| T-cell/histiocyte-rich LBCL                   | 0 (0.0%)      | 4 (2.1%)                    | 4 (1.7%)       |                           |
| PMBL                                          | 2 (4.2%)      | 11 (5.8%)                   | 13 (5.4%)      |                           |
| HGBL                                          | 0 (0.0%)      | 2 (1.0%)                    | 2 (0.8%)       |                           |
| Transformed FL                                | 12 (25.0%)    | 37 (19.4%)                  | 49 (20.5%)     |                           |
| Other                                         | 4 (8.3%)      | 2 (1.0%)                    | 6 (2.5%)       |                           |
| Transformed MZL                               | 2 (4.2%)      | 1 (0.5%)                    | 3 (1.3%)       |                           |
| Transformed Richter LLC                       | 2 (4.2%)      | 1 (0.5%)                    | 3 (1.3%)       |                           |
| Transformed Richter Hodgkin                   | 0 (0.0%)      | 0 (0.0%)                    | 0 (0.0%)       |                           |
| Other                                         | 0 (0.0%)      | 0 (0.0%)                    | 0 (0.0%)       |                           |

\* Living patients without progression at 1 year

### At comorbidity

|                                   | NRM<br>N=48 | Comparative group*<br>N=191 | Total<br>N=239 | Test: Probability         |
|-----------------------------------|-------------|-----------------------------|----------------|---------------------------|
| <b>Solid tumour</b>               |             |                             |                | Fisher Exact<br>P = 0.444 |
| No                                | 40 (85.1%)  | 168 (89.4%)                 | 208 (88.5%)    |                           |
| Yes                               | 7 (14.9%)   | 20 (10.6%)                  | 27 (11.5%)     |                           |
| (-)                               | 1           | 3                           | 4              |                           |
| <b>Inflammatory bowel disease</b> |             |                             |                | Fisher Exact<br>P = 0.359 |
| No                                | 46 (97.9%)  | 188 (99.5%)                 | 234 (99.2%)    |                           |
| Yes                               | 1 (2.1%)    | 1 (0.5%)                    | 2 (0.8%)       |                           |
| (-)                               | 1           | 2                           | 3              |                           |
| <b>Rheumatologic</b>              |             |                             |                | Fisher Exact<br>P = 1.000 |
| No                                | 46 (97.9%)  | 183 (97.3%)                 | 229 (97.4%)    |                           |
| Yes                               | 1 (2.1%)    | 5 (2.7%)                    | 6 (2.6%)       |                           |
| (-)                               | 1           | 3                           | 4              |                           |
| <b>Infection</b>                  |             |                             |                | Fisher Exact<br>P = 0.145 |
| No                                | 44 (93.6%)  | 184 (97.9%)                 | 228 (97.0%)    |                           |
| Yes                               | 3 (6.4%)    | 4 (2.1%)                    | 7 (3.0%)       |                           |
| (-)                               | 1           | 3                           | 4              |                           |
| <b>Diabetes</b>                   |             |                             |                | Fisher Exact<br>P = 0.025 |
| No                                | 36 (76.6%)  | 169 (89.9%)                 | 205 (87.2%)    |                           |
| Yes                               | 11 (23.4%)  | 19 (10.1%)                  | 30 (12.8%)     |                           |

|                                | NRM<br>N=48 | Comparative group*<br>N=191 | Total<br>N=239 | Test: Probability         |
|--------------------------------|-------------|-----------------------------|----------------|---------------------------|
| (-)                            | 1           | 3                           | 4              |                           |
| <b>Renal</b>                   |             |                             |                | Fisher Exact<br>P = 0.100 |
| No                             | 45 (93.8%)  | 185 (98.4%)                 | 230 (97.5%)    |                           |
| Yes                            | 3 (6.3%)    | 3 (1.6%)                    | 6 (2.5%)       |                           |
| (-)                            | 0           | 3                           | 3              |                           |
| <b>Hepatic</b>                 |             |                             |                | Fisher Exact<br>P = -     |
| No                             | 47 (100.0%) | 188 (100.0%)                | 235 (100.0%)   |                           |
| (-)                            | 1           | 3                           | 4              |                           |
| <b>Arrhythmia</b>              |             |                             |                | Fisher Exact<br>P = 0.661 |
| No                             | 45 (95.7%)  | 183 (96.8%)                 | 228 (96.6%)    |                           |
| Yes                            | 2 (4.3%)    | 6 (3.2%)                    | 8 (3.4%)       |                           |
| (-)                            | 1           | 2                           | 3              |                           |
| <b>Cardiac</b>                 |             |                             |                | Fisher Exact<br>P = 0.117 |
| No                             | 41 (87.2%)  | 177 (94.1%)                 | 218 (92.8%)    |                           |
| Yes                            | 6 (12.8%)   | 11 (5.9%)                   | 17 (7.2%)      |                           |
| (-)                            | 1           | 3                           | 4              |                           |
| <b>Cerebrovascular disease</b> |             |                             |                | Fisher Exact<br>P = 0.189 |
| No                             | 42 (89.4%)  | 178 (94.7%)                 | 220 (93.6%)    |                           |
| Yes                            | 5 (10.6%)   | 10 (5.3%)                   | 15 (6.4%)      |                           |
| (-)                            | 1           | 3                           | 4              |                           |
| <b>Heart valve disease</b>     |             |                             |                | Fisher Exact<br>P = 1.000 |
| No                             | 47 (100.0%) | 185 (98.4%)                 | 232 (98.7%)    |                           |
| Yes                            | 0 (0.0%)    | 3 (1.6%)                    | 3 (1.3%)       |                           |
| (-)                            | 1           | 3                           | 4              |                           |
| <b>Pulmonary</b>               |             |                             |                | Fisher Exact<br>P = 0.095 |
| No                             | 42 (89.4%)  | 181 (96.3%)                 | 223 (94.9%)    |                           |
| Yes                            | 4 (8.5%)    | 6 (3.2%)                    | 10 (4.3%)      |                           |
| Not Evaluated                  | 1 (2.1%)    | 1 (0.5%)                    | 2 (0.9%)       |                           |
| (-)                            | 1           | 3                           | 4              |                           |
| <b>Obesity</b>                 |             |                             |                | Fisher Exact<br>P = 0.189 |
| No                             | 42 (89.4%)  | 178 (94.7%)                 | 220 (93.6%)    |                           |
| Yes                            | 5 (10.6%)   | 10 (5.3%)                   | 15 (6.4%)      |                           |
| (-)                            | 1           | 3                           | 4              |                           |
| <b>Peptic ulcer</b>            |             |                             |                | Fisher Exact<br>P = -     |
| No                             | 46 (100.0%) | 188 (100.0%)                | 234 (100.0%)   |                           |
| (-)                            | 2           | 3                           | 5              |                           |

\* Living patients without progression at 1 year

Prior therapy

|                                                                       | NRM<br>N=48    | Comparative group*<br>N=191 | Total<br>N=239 | Test: Probability         |
|-----------------------------------------------------------------------|----------------|-----------------------------|----------------|---------------------------|
| <b>Primary refractory disease</b>                                     |                |                             |                | Fisher Exact<br>P = 0.746 |
| No                                                                    | 25 (52.1%)     | 106 (55.5%)                 | 131 (54.8%)    |                           |
| Yes                                                                   | 23 (47.9%)     | 85 (44.5%)                  | 108 (45.2%)    |                           |
| <b>Duration between first line end and second line start (months)</b> |                |                             |                | Wilcoxon<br>P = 0.471     |
| N                                                                     | 43             | 174                         | 217            |                           |
| Missing                                                               | 5              | 17                          | 22             |                           |
| Mean (SD)                                                             | 14.80 (26.136) | 19.66 (41.486)              | 18.70 (38.924) |                           |
| Median                                                                | 4.53           | 4.17                        | 4.24           |                           |
| Q1; Q3                                                                | 1.0 ; 12.5     | 1.3 ; 14.5                  | 1.2 ; 14.0     |                           |
| Min; Max                                                              | 0.0 ; 105.9    | 0.0 ; 270.7                 | 0.0 ; 270.7    |                           |
| <b>Number of prior lines</b>                                          |                |                             |                | Wilcoxon<br>P = 0.530     |
| N                                                                     | 48             | 191                         | 239            |                           |
| Missing                                                               | 0              | 0                           | 0              |                           |
| Mean (SD)                                                             | 3.0 (1.30)     | 2.9 (1.22)                  | 3.0 (1.23)     |                           |
| Median                                                                | 3.0            | 3.0                         | 3.0            |                           |
| Q1; Q3                                                                | 2 ; 4          | 2 ; 3                       | 2 ; 3          |                           |
| Min; Max                                                              | 2 ; 9          | 2 ; 7                       | 2 ; 9          |                           |
| <b>Prior ASCT</b>                                                     |                |                             |                | Fisher Exact<br>P = 0.858 |
| No                                                                    | 34 (70.8%)     | 138 (72.3%)                 | 172 (72.0%)    |                           |
| Yes                                                                   | 14 (29.2%)     | 53 (27.7%)                  | 67 (28.0%)     |                           |
| <b>Prior allo-SCT</b>                                                 |                |                             |                | Fisher Exact<br>P = 1.000 |
| No                                                                    | 47 (97.9%)     | 185 (96.9%)                 | 232 (97.1%)    |                           |
| Yes                                                                   | 1 (2.1%)       | 6 (3.1%)                    | 7 (2.9%)       |                           |

\* Living patients without progression at 1 year

At time of multidisciplinary

|                         | NRM<br>N=48 | Comparative group*<br>N=191 | Total<br>N=239 | Test: Probability                                   |
|-------------------------|-------------|-----------------------------|----------------|-----------------------------------------------------|
| <b>ECOG</b>             |             |                             |                | Cochran-Mantel-Haenszel Row Mean Score<br>P = 0.344 |
| 0                       | 15 (31.3%)  | 84 (44.2%)                  | 99 (41.6%)     |                                                     |
| 1                       | 24 (50.0%)  | 86 (45.3%)                  | 110 (46.2%)    |                                                     |
| 2                       | 5 (10.4%)   | 10 (5.3%)                   | 15 (6.3%)      |                                                     |
| 3                       | 0 (0.0%)    | 1 (0.5%)                    | 1 (0.4%)       |                                                     |
| NE                      | 4 (8.3%)    | 9 (4.7%)                    | 13 (5.5%)      |                                                     |
| (-)                     | 0           | 1                           | 1              |                                                     |
| <b>Elevated LDH</b>     |             |                             |                | Fisher Exact<br>P = 0.183                           |
| No                      | 14 (29.2%)  | 77 (40.7%)                  | 91 (38.4%)     |                                                     |
| Yes                     | 34 (70.8%)  | 112 (59.3%)                 | 146 (61.6%)    |                                                     |
| (-)                     | 0           | 2                           | 2              |                                                     |
| <b>aalPI</b>            |             |                             |                | Cochran-Mantel-Haenszel Row Mean Score<br>P = 0.024 |
| 0                       | 2 (4.8%)    | 24 (13.7%)                  | 26 (12.0%)     |                                                     |
| 1                       | 13 (31.0%)  | 74 (42.3%)                  | 87 (40.1%)     |                                                     |
| 2                       | 23 (54.8%)  | 73 (41.7%)                  | 96 (44.2%)     |                                                     |
| 3                       | 4 (9.5%)    | 4 (2.3%)                    | 8 (3.7%)       |                                                     |
| (-)                     | 6           | 16                          | 22             |                                                     |
| <b>Leucocytes (G/L)</b> |             |                             |                | Wilcoxon<br>P = -                                   |
| N                       | 0           | 0                           | 0              |                                                     |
| Missing                 | 48          | 191                         | 239            |                                                     |
| Mean (SD)               | . (.)       | . (.)                       | . (.)          |                                                     |
| Median                  | .           | .                           | .              |                                                     |
| Q1; Q3                  | . ; .       | . ; .                       | . ; .          |                                                     |
| Min; Max                | . ; .       | . ; .                       | . ; .          |                                                     |
| <b>LDH (IU/L)</b>       |             |                             |                | Wilcoxon<br>P = -                                   |
| N                       | 0           | 0                           | 0              |                                                     |
| Missing                 | 48          | 191                         | 239            |                                                     |
| Mean (SD)               | . (.)       | . (.)                       | . (.)          |                                                     |
| Median                  | .           | .                           | .              |                                                     |
| Q1; Q3                  | . ; .       | . ; .                       | . ; .          |                                                     |
| Min; Max                | . ; .       | . ; .                       | . ; .          |                                                     |

## At bridging

|                             | NRM<br>N=48 | Comparative group*<br>N=191 | Total<br>N=239 | Test: Probability                                   |
|-----------------------------|-------------|-----------------------------|----------------|-----------------------------------------------------|
| <b>Response to bridging</b> |             |                             |                | Cochran-Mantel-Haenszel Row Mean Score<br>P = 0.569 |
| Complete Response           | 3 (7.0%)    | 19 (13.1%)                  | 22 (11.7%)     |                                                     |
| Partial Response            | 9 (20.9%)   | 39 (26.9%)                  | 48 (25.5%)     |                                                     |
| Stable Disease              | 7 (16.3%)   | 22 (15.2%)                  | 29 (15.4%)     |                                                     |
| Progressive Disease         | 21 (48.8%)  | 60 (41.4%)                  | 81 (43.1%)     |                                                     |
| Not Evaluated               | 3 (7.0%)    | 5 (3.4%)                    | 8 (4.3%)       |                                                     |
| (-)                         | 5           | 46                          | 51             |                                                     |

## At leukapheresis

|                                    | NRM<br>N=48     | Comparative group*<br>N=191 | Total<br>N=239    | Test: Probability     |
|------------------------------------|-----------------|-----------------------------|-------------------|-----------------------|
| <b>Hemoglobin (g/dL)</b>           |                 |                             |                   | Wilcoxon<br>P = 0.143 |
| N                                  | 47              | 188                         | 235               |                       |
| Missing                            | 1               | 3                           | 4                 |                       |
| Mean (SD)                          | 10.86 (1.695)   | 11.68 (6.396)               | 11.51 (5.776)     |                       |
| Median                             | 10.70           | 11.20                       | 11.10             |                       |
| Q1; Q3                             | 10.0 ; 11.9     | 10.1 ; 12.4                 | 10.0 ; 12.3       |                       |
| Min; Max                           | 7.5 ; 15.4      | 6.4 ; 96.0                  | 6.4 ; 96.0        |                       |
| <b>Leukocytes (WBC) (G/L)</b>      |                 |                             |                   | Wilcoxon<br>P = 0.028 |
| N                                  | 47              | 188                         | 235               |                       |
| Missing                            | 1               | 3                           | 4                 |                       |
| Mean (SD)                          | 7.577 (10.4160) | 5.292 (2.7485)              | 5.749 (5.3107)    |                       |
| Median                             | 6.300           | 4.800                       | 5.000             |                       |
| Q1; Q3                             | 3.90 ; 7.90     | 3.50 ; 6.75                 | 3.50 ; 7.00       |                       |
| Min; Max                           | 1.80 ; 75.15    | 0.60 ; 23.20                | 0.60 ; 75.15      |                       |
| <b>Neutrophils (ANC/AGC) (G/L)</b> |                 |                             |                   | Wilcoxon<br>P = 0.013 |
| N                                  | 47              | 186                         | 233               |                       |
| Missing                            | 1               | 5                           | 6                 |                       |
| Mean (SD)                          | 5.311 (7.6331)  | 3.801 (5.1083)              | 4.106 (5.7209)    |                       |
| Median                             | 4.280           | 3.100                       | 3.270             |                       |
| Q1; Q3                             | 2.40 ; 5.30     | 2.00 ; 4.40                 | 2.10 ; 4.80       |                       |
| Min; Max                           | 0.20 ; 54.10    | 0.02 ; 66.20                | 0.02 ; 66.20      |                       |
| <b>Lymphocytes (ALC) (G/L)</b>     |                 |                             |                   | Wilcoxon<br>P = 0.243 |
| N                                  | 47              | 184                         | 231               |                       |
| Missing                            | 1               | 7                           | 8                 |                       |
| Mean (SD)                          | 0.848 (0.5916)  | 0.960 (0.7079)              | 0.937 (0.6861)    |                       |
| Median                             | 0.600           | 0.800                       | 0.700             |                       |
| Q1; Q3                             | 0.50 ; 1.10     | 0.50 ; 1.30                 | 0.50 ; 1.30       |                       |
| Min; Max                           | 0.20 ; 3.01     | 0.10 ; 5.00                 | 0.10 ; 5.00       |                       |
| <b>Lymphocytes B (units/μL)</b>    |                 |                             |                   | Wilcoxon<br>P = 0.428 |
| N                                  | 2               | 53                          | 55                |                       |
| Missing                            | 46              | 138                         | 184               |                       |
| Mean (SD)                          | 0.000 (0.0000)  | 30.662 (123.1163)           | 29.547 (120.9537) |                       |
| Median                             | 0.000           | 0.000                       | 0.000             |                       |
| Q1; Q3                             | 0.00 ; 0.00     | 0.00 ; 0.04                 | 0.00 ; 0.04       |                       |
| Min; Max                           | 0.00 ; 0.00     | 0.00 ; 651.00               | 0.00 ; 651.00     |                       |
| <b>Platelets (G/L)</b>             |                 |                             |                   | Wilcoxon<br>P = 0.481 |
| N                                  | 46              | 188                         | 234               |                       |
| Missing                            | 2               | 3                           | 5                 |                       |
| Mean (SD)                          | 182.7 (92.72)   | 204.5 (138.54)              | 200.2 (130.92)    |                       |
| Median                             | 167.0           | 192.0                       | 188.0             |                       |
| Q1; Q3                             | 123 ; 250       | 126 ; 240                   | 124 ; 241         |                       |
| Min; Max                           | 22 ; 529        | 24 ; 1171                   | 22 ; 1171         |                       |
| <b>AST (SGOT) (IU/L)</b>           |                 |                             |                   | Wilcoxon<br>P = 0.345 |
| N                                  | 40              | 157                         | 197               |                       |
| Missing                            | 8               | 34                          | 42                |                       |
| Mean (SD)                          | 24.7 (12.18)    | 27.3 (18.15)                | 26.8 (17.11)      |                       |
| Median                             | 23.0            | 24.0                        | 24.0              |                       |
| Q1; Q3                             | 17 ; 31         | 18 ; 31                     | 18 ; 31           |                       |
| Min; Max                           | 10 ; 71         | 5 ; 189                     | 5 ; 189           |                       |
| <b>ALT (SGPT) (IU/L)</b>           |                 |                             |                   | Wilcoxon<br>P = 0.077 |
| N                                  | 40              | 157                         | 197               |                       |
| Missing                            | 8               | 34                          | 42                |                       |
| Mean (SD)                          | 21.4 (11.07)    | 26.4 (16.83)                | 25.4 (15.93)      |                       |
| Median                             | 18.0            | 23.0                        | 23.0              |                       |
| Q1; Q3                             | 14 ; 28         | 16 ; 31                     | 16 ; 30           |                       |
| Min; Max                           | 6 ; 61          | 4 ; 134                     | 4 ; 134           |                       |

|                                      | NRM<br>N=48    | Comparative group*<br>N=191 | Total<br>N=239 | Test: Probability      |
|--------------------------------------|----------------|-----------------------------|----------------|------------------------|
| <b>LDH (IU/L)</b>                    |                |                             |                | Wilcoxon<br>P = 0.768  |
| N                                    | 31             | 138                         | 169            |                        |
| Missing                              | 17             | 53                          | 70             |                        |
| Mean (SD)                            | 363.8 (286.84) | 344.7 (238.25)              | 348.2 (247.06) |                        |
| Median                               | 262.0          | 268.5                       | 267.0          |                        |
| Q1; Q3                               | 185 ; 469      | 214 ; 389                   | 212 ; 404      |                        |
| Min; Max                             | 115 ; 1590     | 122 ; 1949                  | 115 ; 1949     |                        |
| <b>Serum creatinine (µmol/L)</b>     |                |                             |                | Wilcoxon<br>P = 0.798  |
| N                                    | 39             | 164                         | 203            |                        |
| Missing                              | 9              | 27                          | 36             |                        |
| Mean (SD)                            | 80.4 (32.47)   | 74.9 (21.19)                | 76.0 (23.78)   |                        |
| Median                               | 74.0           | 71.0                        | 71.0           |                        |
| Q1; Q3                               | 59 ; 88        | 62 ; 86                     | 61 ; 87        |                        |
| Min; Max                             | 39 ; 179       | 35 ; 171                    | 35 ; 179       |                        |
| <b>Creatinine clearance (mL/min)</b> |                |                             |                | Wilcoxon<br>P = 0.777  |
| N                                    | 38             | 161                         | 199            |                        |
| Missing                              | 10             | 30                          | 40             |                        |
| Mean (SD)                            | 84.3 (25.01)   | 87.3 (24.91)                | 86.7 (24.90)   |                        |
| Median                               | 89.0           | 90.0                        | 90.0           |                        |
| Q1; Q3                               | 69 ; 100       | 73 ; 98                     | 72 ; 98        |                        |
| Min; Max                             | 33 ; 134       | 5 ; 189                     | 5 ; 189        |                        |
| <b>C Reactive protein (mg/L)</b>     |                |                             |                | Wilcoxon<br>P = <0.001 |
| N                                    | 34             | 132                         | 166            |                        |
| Missing                              | 14             | 59                          | 73             |                        |
| Mean (SD)                            | 35.1 (40.50)   | 20.6 (41.31)                | 23.5 (41.45)   |                        |
| Median                               | 17.5           | 6.0                         | 6.3            |                        |
| Q1; Q3                               | 6 ; 61         | 3 ; 14                      | 3 ; 19         |                        |
| Min; Max                             | 3 ; 174        | 0 ; 287                     | 0 ; 287        |                        |
| <b>Ferritine (µg/L)</b>              |                |                             |                | Wilcoxon<br>P = 0.557  |
| N                                    | 12             | 78                          | 90             |                        |
| Missing                              | 36             | 113                         | 149            |                        |
| Mean (SD)                            | 594.0 (533.39) | 875.1 (993.20)              | 837.6 (947.55) |                        |
| Median                               | 421.0          | 493.0                       | 475.5          |                        |
| Q1; Q3                               | 219 ; 758      | 238 ; 1026                  | 238 ; 1009     |                        |
| Min; Max                             | 92 ; 1804      | 16 ; 4366                   | 16 ; 4366      |                        |
| <b>Fibrinogen (g/L)</b>              |                |                             |                | Wilcoxon<br>P = 0.043  |
| N                                    | 22             | 89                          | 111            |                        |
| Missing                              | 26             | 102                         | 128            |                        |
| Mean (SD)                            | 5.023 (1.7934) | 4.318 (1.2966)              | 4.458 (1.4278) |                        |
| Median                               | 4.700          | 4.100                       | 4.300          |                        |
| Q1; Q3                               | 4.10 ; 5.90    | 3.50 ; 4.70                 | 3.50 ; 5.10    |                        |
| Min; Max                             | 2.20 ; 10.00   | 0.83 ; 9.00                 | 0.83 ; 10.00   |                        |
| <b>Gamma-GT (IU/L)</b>               |                |                             |                | Wilcoxon<br>P = 0.885  |
| N                                    | 37             | 148                         | 185            |                        |
| Missing                              | 11             | 43                          | 54             |                        |
| Mean (SD)                            | 81.4 (121.66)  | 65.1 (89.68)                | 68.4 (96.77)   |                        |
| Median                               | 35.0           | 34.5                        | 35.0           |                        |
| Q1; Q3                               | 22 ; 90        | 23 ; 67                     | 23 ; 69        |                        |
| Min; Max                             | 9 ; 657        | 6 ; 779                     | 6 ; 779        |                        |
| <b>Total bilirubin (µmol/L)</b>      |                |                             |                | Wilcoxon<br>P = 0.107  |
| N                                    | 39             | 152                         | 191            |                        |
| Missing                              | 9              | 39                          | 48             |                        |
| Mean (SD)                            | 5.8 (3.04)     | 7.0 (4.78)                  | 6.8 (4.50)     |                        |
| Median                               | 5.0            | 6.0                         | 6.0            |                        |
| Q1; Q3                               | 3 ; 7          | 4 ; 8                       | 4 ; 8          |                        |
| Min; Max                             | 1 ; 15         | 2 ; 37                      | 1 ; 37         |                        |

## At lymphodepletion

|                                                                      | NRM<br>N=48     |         | Comparative<br>group*<br>N=191 |         | Total<br>N=239 |         | Test: Probability       |            |
|----------------------------------------------------------------------|-----------------|---------|--------------------------------|---------|----------------|---------|-------------------------|------------|
| <b>Bulk &gt; 5cm</b>                                                 |                 |         |                                |         |                |         | Fisher                  | Exact      |
| No                                                                   | 31              | (66.0%) | 153                            | (80.1%) | 184            | (77.3%) | P = 0.051               |            |
| Yes                                                                  | 16              | (34.0%) | 38                             | (19.9%) | 54             | (22.7%) |                         |            |
| (-)                                                                  | 1               |         | 0                              |         | 1              |         |                         |            |
| <b>ECOG</b>                                                          |                 |         |                                |         |                |         | Cochran-Mantel-Haenszel | Mean Score |
| Normal activities                                                    | 10              | (21.3%) | 94                             | (49.5%) | 104            | (43.9%) | P = <0.001              |            |
| Ambulatory able to carry out work                                    | 23              | (48.9%) | 76                             | (40.0%) | 99             | (41.8%) |                         |            |
| Ambulatory unable to carry out work                                  | 8               | (17.0%) | 5                              | (2.6%)  | 13             | (5.5%)  |                         |            |
| Confined to chair more than 50% of waking hours                      | 1               | (2.1%)  | 3                              | (1.6%)  | 4              | (1.7%)  |                         |            |
| Totally confined to chair                                            | 0               | (0.0%)  | 1                              | (0.5%)  | 1              | (0.4%)  |                         |            |
| Not Evaluated                                                        | 5               | (10.6%) | 11                             | (5.8%)  | 16             | (6.8%)  |                         |            |
| (-)                                                                  | 1               |         | 1                              |         | 2              |         |                         |            |
| <b>ECOG **</b>                                                       |                 |         |                                |         |                |         | Fisher                  | Exact      |
| 0-1                                                                  | 34              | (77.3%) | 176                            | (95.1%) | 210            | (91.7%) | P = <0.001              |            |
| >=2                                                                  | 10              | (22.7%) | 9                              | (4.9%)  | 19             | (8.3%)  |                         |            |
| (-)                                                                  | 4               |         | 6                              |         | 10             |         |                         |            |
| <b>Duration between last drug administration and lymphodepletion</b> |                 |         |                                |         |                |         | Wilcoxon                | P = 0.183  |
| N                                                                    | 39              |         | 175                            |         | 214            |         |                         |            |
| Missing                                                              | 9               |         | 16                             |         | 25             |         |                         |            |
| Mean (SD)                                                            | 34.0 (31.40)    |         | 63.2 (141.93)                  |         | 57.9 (129.46)  |         |                         |            |
| Median                                                               | 25.0            |         | 28.0                           |         | 28.0           |         |                         |            |
| Q1; Q3                                                               | 19 ; 31         |         | 19 ; 56                        |         | 19 ; 51        |         |                         |            |
| Min; Max                                                             | 1 ; 168         |         | 1 ; 1498                       |         | 1 ; 1498       |         |                         |            |
| <b>Hypogammaglobulinemia</b>                                         |                 |         |                                |         |                |         | Fisher                  | Exact      |
| No                                                                   | 14              | (45.2%) | 78                             | (52.0%) | 92             | (50.8%) | P = 0.556               |            |
| Yes                                                                  | 17              | (54.8%) | 72                             | (48.0%) | 89             | (49.2%) |                         |            |
| (-)                                                                  | 17              |         | 41                             |         | 58             |         |                         |            |
| <b>Hemoglobin (g/dL)</b>                                             |                 |         |                                |         |                |         | Wilcoxon                | P = 0.002  |
| N                                                                    | 45              |         | 189                            |         | 234            |         |                         |            |
| Missing                                                              | 3               |         | 2                              |         | 5              |         |                         |            |
| Mean (SD)                                                            | 10.04 (1.839)   |         | 12.07 (10.185)                 |         | 11.68 (9.219)  |         |                         |            |
| Median                                                               | 9.60            |         | 10.70                          |         | 10.50          |         |                         |            |
| Q1; Q3                                                               | 8.8 ; 11.6      |         | 9.9 ; 11.9                     |         | 9.5 ; 11.9     |         |                         |            |
| Min; Max                                                             | 6.3 ; 13.6      |         | 7.2 ; 98.0                     |         | 6.3 ; 98.0     |         |                         |            |
| <b>Leukocytes (WBC) (G/L)</b>                                        |                 |         |                                |         |                |         | Wilcoxon                | P = 0.081  |
| N                                                                    | 45              |         | 188                            |         | 233            |         |                         |            |
| Missing                                                              | 3               |         | 3                              |         | 6              |         |                         |            |
| Mean (SD)                                                            | 8.723 (20.7708) |         | 4.232 (1.8121)                 |         | 5.099 (9.3609) |         |                         |            |
| Median                                                               | 4.340           |         | 4.100                          |         | 4.100          |         |                         |            |
| Q1; Q3                                                               | 3.00 ; 6.50     |         | 3.00 ; 5.15                    |         | 3.00 ; 5.20    |         |                         |            |
| Min; Max                                                             | 1.40 ; 142.00   |         | 1.30 ; 12.50                   |         | 1.30 ; 142.00  |         |                         |            |
| <b>Neutrophils (ANC/AGC) (G/L)</b>                                   |                 |         |                                |         |                |         | Wilcoxon                | P = 0.483  |
| N                                                                    | 43              |         | 178                            |         | 221            |         |                         |            |
| Missing                                                              | 5               |         | 13                             |         | 18             |         |                         |            |
| Mean (SD)                                                            | 3.670 (3.9129)  |         | 2.693 (1.5781)                 |         | 2.883 (2.2531) |         |                         |            |
| Median                                                               | 2.900           |         | 2.515                          |         | 2.590          |         |                         |            |
| Q1; Q3                                                               | 1.50 ; 3.90     |         | 1.70 ; 3.40                    |         | 1.60 ; 3.60    |         |                         |            |
| Min; Max                                                             | 0.00 ; 19.60    |         | 0.00 ; 10.20                   |         | 0.00 ; 19.60   |         |                         |            |
| <b>Lymphocytes (ALC) (G/L)</b>                                       |                 |         |                                |         |                |         | Wilcoxon                | P = 0.744  |
| N                                                                    | 43              |         | 172                            |         | 215            |         |                         |            |
| Missing                                                              | 5               |         | 19                             |         | 24             |         |                         |            |
| Mean (SD)                                                            | 3.764 (20.3405) |         | 0.910 (2.8863)                 |         | 1.481 (9.4429) |         |                         |            |
| Median                                                               | 0.600           |         | 0.600                          |         | 0.600          |         |                         |            |
| Q1; Q3                                                               | 0.20 ; 1.00     |         | 0.40 ; 0.90                    |         | 0.40 ; 0.90    |         |                         |            |
| Min; Max                                                             | 0.00 ; 134.00   |         | 0.00 ; 38.00                   |         | 0.00 ; 134.00  |         |                         |            |



|                                                 | NRM<br>N=48    | Comparative<br>group*<br>N=191 | Total<br>N=239 | Test: Probability            |
|-------------------------------------------------|----------------|--------------------------------|----------------|------------------------------|
| <b>Lymphocytes B (units/<math>\mu</math>L)</b>  |                |                                |                | Wilcoxon<br>P = 0.806        |
| N                                               | 6              | 53                             | 59             |                              |
| Missing                                         | 42             | 138                            | 180            |                              |
| Mean (SD)                                       | 0.02 (0.041)   | 0.95 (6.451)                   | 0.86 (6.115)   |                              |
| Median                                          | 0.00           | 0.00                           | 0.00           |                              |
| Q1; Q3                                          | 0.0 ; 0.0      | 0.0 ; 0.0                      | 0.0 ; 0.0      |                              |
| Min; Max                                        | 0.0 ; 0.1      | 0.0 ; 47.0                     | 0.0 ; 47.0     |                              |
| <b>Platelets (G/L)</b>                          |                |                                |                | Wilcoxon<br>P = 0.034        |
| N                                               | 45             | 189                            | 234            |                              |
| Missing                                         | 3              | 2                              | 5              |                              |
| Mean (SD)                                       | 161.2 (96.02)  | 188.1 (82.95)                  | 183.0 (86.06)  |                              |
| Median                                          | 156.0          | 185.0                          | 182.0          |                              |
| Q1; Q3                                          | 91 ; 215       | 137 ; 234                      | 133 ; 230      |                              |
| Min; Max                                        | 25 ; 397       | 17 ; 599                       | 17 ; 599       |                              |
| <b>Platelets &gt; 50GL **</b>                   |                |                                |                | Fisher<br>P = 0.094<br>Exact |
| No                                              | 17 (37.8%)     | 43 (24.9%)                     | 60 (27.5%)     |                              |
| Yes                                             | 28 (62.2%)     | 130 (75.1%)                    | 158 (72.5%)    |                              |
| (-)                                             | 3              | 18                             | 21             |                              |
| <b>AST (SGOT) (IU/L)</b>                        |                |                                |                | Wilcoxon<br>P = 0.584        |
| N                                               | 40             | 186                            | 226            |                              |
| Missing                                         | 8              | 5                              | 13             |                              |
| Mean (SD)                                       | 45.1 (103.05)  | 24.9 (14.87)                   | 28.5 (45.63)   |                              |
| Median                                          | 23.0           | 22.0                           | 22.0           |                              |
| Q1; Q3                                          | 16 ; 30        | 17 ; 28                        | 17 ; 28        |                              |
| Min; Max                                        | 8 ; 649        | 9 ; 139                        | 8 ; 649        |                              |
| <b>ALT (SGPT) (IU/L)</b>                        |                |                                |                | Wilcoxon<br>P = 0.952        |
| N                                               | 41             | 186                            | 227            |                              |
| Missing                                         | 7              | 5                              | 12             |                              |
| Mean (SD)                                       | 29.3 (43.95)   | 25.1 (21.63)                   | 25.9 (26.97)   |                              |
| Median                                          | 21.0           | 20.5                           | 21.0           |                              |
| Q1; Q3                                          | 13 ; 30        | 15 ; 29                        | 15 ; 29        |                              |
| Min; Max                                        | 6 ; 294        | 6 ; 227                        | 6 ; 294        |                              |
| <b>LDH (IU/L)</b>                               |                |                                |                | Wilcoxon<br>P = 0.432        |
| N                                               | 40             | 177                            | 217            |                              |
| Missing                                         | 8              | 14                             | 22             |                              |
| Mean (SD)                                       | 496.6 (935.11) | 307.2 (227.89)                 | 342.1 (453.45) |                              |
| Median                                          | 241.5          | 242.0                          | 242.0          |                              |
| Q1; Q3                                          | 186 ; 511      | 195 ; 340                      | 195 ; 348      |                              |
| Min; Max                                        | 127 ; 6066     | 75 ; 1876                      | 75 ; 6066      |                              |
| <b>LDH (IU/L) **</b>                            |                |                                |                | Fisher<br>P = 0.362<br>Exact |
| Normal                                          | 20 (43.5%)     | 101 (54.3%)                    | 121 (52.2%)    |                              |
| > Upper limit                                   | 25 (54.3%)     | 81 (43.5%)                     | 106 (45.7%)    |                              |
| Not done                                        | 1 (2.2%)       | 4 (2.2%)                       | 5 (2.2%)       |                              |
| (-)                                             | 2              | 5                              | 7              |                              |
| <b>Serum creatinine (<math>\mu</math>mol/L)</b> |                |                                |                | Wilcoxon<br>P = 0.685        |
| N                                               | 43             | 187                            | 230            |                              |
| Missing                                         | 5              | 4                              | 9              |                              |
| Mean (SD)                                       | 78.4 (31.67)   | 73.6 (21.49)                   | 74.5 (23.72)   |                              |
| Median                                          | 77.0           | 71.0                           | 71.0           |                              |
| Q1; Q3                                          | 53 ; 91        | 58 ; 83                        | 57 ; 88        |                              |
| Min; Max                                        | 35 ; 160       | 35 ; 150                       | 35 ; 160       |                              |
| <b>Creatinine clearance (mL/min)</b>            |                |                                |                | Wilcoxon<br>P = 0.730        |
| N                                               | 39             | 182                            | 221            |                              |
| Missing                                         | 9              | 9                              | 18             |                              |
| Mean (SD)                                       | 86.3 (28.55)   | 88.3 (25.10)                   | 87.9 (25.69)   |                              |
| Median                                          | 90.0           | 89.0                           | 89.0           |                              |
| Q1; Q3                                          | 70 ; 100       | 74 ; 98                        | 73 ; 100       |                              |
| Min; Max                                        | 31 ; 164       | 38 ; 219                       | 31 ; 219       |                              |

|                                     | NRM<br>N=48      | Comparative<br>group*<br>N=191 | Total<br>N=239  | Test: Probability             |
|-------------------------------------|------------------|--------------------------------|-----------------|-------------------------------|
| <b>C Reactive protein (mg/L)</b>    |                  |                                |                 | Wilcoxon<br>P = <0.001        |
| N                                   | 39               | 171                            | 210             |                               |
| Missing                             | 9                | 20                             | 29              |                               |
| Mean (SD)                           | 37.3 (53.20)     | 14.9 (34.21)                   | 19.1 (39.28)    |                               |
| Median                              | 17.0             | 5.0                            | 6.0             |                               |
| Q1; Q3                              | 5 ; 36           | 2 ; 13                         | 2 ; 17          |                               |
| Min; Max                            | 2 ; 236          | 0 ; 299                        | 0 ; 299         |                               |
| <b>C Reactive protein (mg/L) **</b> |                  |                                |                 | Fisher<br>P = 0.012<br>Exact  |
| <= 30 mg/L                          | 31 (67.4%)       | 163 (85.8%)                    | 194 (82.2%)     |                               |
| > 30 mg/L                           | 13 (28.3%)       | 22 (11.6%)                     | 35 (14.8%)      |                               |
| Not done                            | 2 (4.3%)         | 5 (2.6%)                       | 7 (3.0%)        |                               |
| (-)                                 | 2                | 1                              | 3               |                               |
| <b>Ferritine (µg/L)</b>             |                  |                                |                 | Wilcoxon<br>P = 0.002         |
| N                                   | 31               | 150                            | 181             |                               |
| Missing                             | 17               | 41                             | 58              |                               |
| Mean (SD)                           | 2036.5 (4430.83) | 644.3 (828.84)                 | 882.7 (2029.12) |                               |
| Median                              | 732.0            | 393.0                          | 461.0           |                               |
| Q1; Q3                              | 399 ; 1418       | 180 ; 811                      | 208 ; 860       |                               |
| Min; Max                            | 53 ; 22195       | 5 ; 5789                       | 5 ; 22195       |                               |
| <b>Ferritine (µg/L) **</b>          |                  |                                |                 | Fisher<br>P = <0.001<br>Exact |
| Normal                              | 6 (13.3%)        | 64 (34.6%)                     | 70 (30.4%)      |                               |
| > Upper limit                       | 29 (64.4%)       | 110 (59.5%)                    | 139 (60.4%)     |                               |
| Not done                            | 10 (22.2%)       | 11 (5.9%)                      | 21 (9.1%)       |                               |
| (-)                                 | 3                | 6                              | 9               |                               |
| <b>Fibrinogen (g/L)</b>             |                  |                                |                 | Wilcoxon<br>P = 0.477         |
| N                                   | 24               | 110                            | 134             |                               |
| Missing                             | 24               | 81                             | 105             |                               |
| Mean (SD)                           | 4.131 (1.6777)   | 3.827 (1.1819)                 | 3.881 (1.2827)  |                               |
| Median                              | 3.750            | 3.700                          | 3.700           |                               |
| Q1; Q3                              | 3.15 ; 4.70      | 2.90 ; 4.50                    | 3.00 ; 4.50     |                               |
| Min; Max                            | 1.70 ; 10.00     | 1.40 ; 9.00                    | 1.40 ; 10.00    |                               |
| <b>Gamma-GT (IU/L)</b>              |                  |                                |                 | Wilcoxon<br>P = 0.017         |
| N                                   | 35               | 174                            | 209             |                               |
| Missing                             | 13               | 17                             | 30              |                               |
| Mean (SD)                           | 103.2 (149.08)   | 59.3 (106.42)                  | 66.7 (115.42)   |                               |
| Median                              | 50.0             | 30.0                           | 33.0            |                               |
| Q1; Q3                              | 30 ; 110         | 20 ; 63                        | 21 ; 66         |                               |
| Min; Max                            | 13 ; 658         | 4 ; 983                        | 4 ; 983         |                               |
| <b>Total bilirubin (µmol/L)</b>     |                  |                                |                 | Wilcoxon<br>P = 0.623         |
| N                                   | 40               | 181                            | 221             |                               |
| Missing                             | 8                | 10                             | 18              |                               |
| Mean (SD)                           | 6.5 (4.33)       | 7.1 (5.77)                     | 7.0 (5.53)      |                               |
| Median                              | 5.0              | 6.0                            | 6.0             |                               |
| Q1; Q3                              | 4 ; 7            | 4 ; 8                          | 4 ; 8           |                               |
| Min; Max                            | 2 ; 24           | 1 ; 59                         | 1 ; 59          |                               |
| <b>CAR-HEMATOTOX</b>                |                  |                                |                 | Fisher<br>P = <0.001<br>Exact |
| Low                                 | 20 (41.7%)       | 136 (71.2%)                    | 156 (65.3%)     |                               |
| High                                | 28 (58.3%)       | 55 (28.8%)                     | 83 (34.7%)      |                               |
| <b>EASIX score</b>                  |                  |                                |                 | Wilcoxon<br>P = <0.001        |
| N                                   | 40               | 174                            | 214             |                               |
| Missing                             | 8                | 17                             | 25              |                               |
| Mean (SD)                           | 44.6 (118.93)    | 17.4 (29.91)                   | 22.5 (58.56)    |                               |
| Median                              | 17.1             | 10.0                           | 10.8            |                               |
| Q1; Q3                              | 9 ; 32           | 6 ; 16                         | 7 ; 19          |                               |
| Min; Max                            | 4 ; 758          | 2 ; 255                        | 2 ; 758         |                               |

|                               | NRM<br>N=48   | Comparative<br>group*<br>N=191 | Total<br>N=239 | Test: Probability                                      |
|-------------------------------|---------------|--------------------------------|----------------|--------------------------------------------------------|
| <b>Simplified EASIX score</b> |               |                                |                | Wilcoxon<br>P = 0.004                                  |
| N                             | 40            | 176                            | 216            |                                                        |
| Missing                       | 8             | 15                             | 23             |                                                        |
| Mean (SD)                     | 8.7 (29.90)   | 2.4 (4.55)                     | 3.6 (13.60)    |                                                        |
| Median                        | 2.2           | 1.4                            | 1.5            |                                                        |
| Q1; Q3                        | 1 ; 4         | 1 ; 2                          | 1 ; 2          |                                                        |
| Min; Max                      | 1 ; 190       | 0 ; 45                         | 0 ; 190        |                                                        |
| <b>Modified EASIX score</b>   |               |                                |                | Wilcoxon<br>P = <0.001                                 |
| N                             | 36            | 162                            | 198            |                                                        |
| Missing                       | 12            | 29                             | 41             |                                                        |
| Mean (SD)                     | 40.3 (111.71) | 5.3 (21.33)                    | 11.7 (52.65)   |                                                        |
| Median                        | 5.0           | 0.8                            | 0.9            |                                                        |
| Q1; Q3                        | 1 ; 16        | 0 ; 3                          | 0 ; 4          |                                                        |
| Min; Max                      | 0 ; 607       | 0 ; 215                        | 0 ; 607        |                                                        |
| <b>EASIX-F score</b>          |               |                                |                | Cochran-Mantel-Haenszel<br>Row Mean Score<br>P = 0.004 |
| High risk                     | 12 (41.4%)    | 23 (17.2%)                     | 35 (21.5%)     |                                                        |
| Low risk                      | 17 (58.6%)    | 111 (82.8%)                    | 128 (78.5%)    |                                                        |
| (-)                           | 19            | 57                             | 76             |                                                        |
| <b>EASIX-FC score</b>         |               |                                |                | Cochran-Mantel-Haenszel<br>Row Mean Score<br>P = -     |
| Low risk                      | 15 (100.0%)   | 93 (100.0%)                    | 108 (100.0%)   |                                                        |
| (-)                           | 33            | 98                             | 131            |                                                        |

## At infusion

|                                                 | NRM<br>N=48      |         | Comparative group*<br>N=191 |         | Total<br>N=239   |         | Test: Probability                                      |
|-------------------------------------------------|------------------|---------|-----------------------------|---------|------------------|---------|--------------------------------------------------------|
| <b>CAR-T product</b>                            |                  |         |                             |         |                  |         | Fisher<br>P = 0.287<br>Exact                           |
| Tisagenlecleucel-KYMRIAH                        | 17               | (35.4%) | 52                          | (27.2%) | 69               | (28.9%) |                                                        |
| Axicabtagene ciloleucel-YESCARTA                | 31               | (64.6%) | 139                         | (72.8%) | 170              | (71.1%) |                                                        |
| <b>ECOG</b>                                     |                  |         |                             |         |                  |         | Cochran-Mantel-Haenszel<br>Row Mean Score<br>P = 0.115 |
| Normal activities                               | 12               | (27.9%) | 86                          | (45.7%) | 98               | (42.4%) |                                                        |
| Ambulatory able to carry out work               | 17               | (39.5%) | 72                          | (38.3%) | 89               | (38.5%) |                                                        |
| Ambulatory unable to carry out work             | 6                | (14.0%) | 10                          | (5.3%)  | 16               | (6.9%)  |                                                        |
| Confined to chair more than 50% of waking hours | 1                | (2.3%)  | 3                           | (1.6%)  | 4                | (1.7%)  |                                                        |
| Totally confined to chair                       | 1                | (2.3%)  | 1                           | (0.5%)  | 2                | (0.9%)  |                                                        |
| Not Evaluated                                   | 6                | (14.0%) | 16                          | (8.5%)  | 22               | (9.5%)  |                                                        |
| (-)                                             | 5                |         | 3                           |         | 8                |         |                                                        |
| <b>Hemoglobin (g/dL)</b>                        |                  |         |                             |         |                  |         | Wilcoxon<br>P = 0.002                                  |
| N                                               | 47               |         | 191                         |         | 238              |         |                                                        |
| Missing                                         | 1                |         | 0                           |         | 1                |         |                                                        |
| Mean (SD)                                       | 9.50 (1.378)     |         | 11.18 (8.175)               |         | 10.85 (7.376)    |         |                                                        |
| Median                                          | 9.30             |         | 10.00                       |         | 9.90             |         |                                                        |
| Q1; Q3                                          | 8.3 ; 10.3       |         | 9.2 ; 11.1                  |         | 9.0 ; 11.0       |         |                                                        |
| Min; Max                                        | 7.7 ; 12.6       |         | 7.4 ; 78.0                  |         | 7.4 ; 78.0       |         |                                                        |
| <b>Leukocytes (WBC) (G/L)</b>                   |                  |         |                             |         |                  |         | Wilcoxon<br>P = 0.055                                  |
| N                                               | 47               |         | 191                         |         | 238              |         |                                                        |
| Missing                                         | 1                |         | 0                           |         | 1                |         |                                                        |
| Mean (SD)                                       | 1.781 (1.2582)   |         | 2.140 (1.2728)              |         | 2.069 (1.2753)   |         |                                                        |
| Median                                          | 1.400            |         | 1.900                       |         | 1.900            |         |                                                        |
| Q1; Q3                                          | 0.80 ; 2.30      |         | 1.26 ; 2.71                 |         | 1.20 ; 2.70      |         |                                                        |
| Min; Max                                        | 0.01 ; 4.80      |         | 0.00 ; 6.80                 |         | 0.00 ; 6.80      |         |                                                        |
| <b>Neutrophils (ANC/AGC) (G/L)</b>              |                  |         |                             |         |                  |         | Wilcoxon<br>P = 0.093                                  |
| N                                               | 45               |         | 185                         |         | 230              |         |                                                        |
| Missing                                         | 3                |         | 6                           |         | 9                |         |                                                        |
| Mean (SD)                                       | 1.599 (1.5368)   |         | 1.788 (1.2205)              |         | 1.751 (1.2870)   |         |                                                        |
| Median                                          | 1.200            |         | 1.610                       |         | 1.515            |         |                                                        |
| Q1; Q3                                          | 0.70 ; 2.10      |         | 0.90 ; 2.40                 |         | 0.90 ; 2.40      |         |                                                        |
| Min; Max                                        | 0.00 ; 7.90      |         | 0.00 ; 6.60                 |         | 0.00 ; 7.90      |         |                                                        |
| <b>Lymphocytes (ALC) (G/L)</b>                  |                  |         |                             |         |                  |         | Wilcoxon<br>P = 0.683                                  |
| N                                               | 44               |         | 177                         |         | 221              |         |                                                        |
| Missing                                         | 4                |         | 14                          |         | 18               |         |                                                        |
| Mean (SD)                                       | 0.9384 (4.88331) |         | 0.1686 (0.46125)            |         | 0.3218 (2.21948) |         |                                                        |
| Median                                          | 0.0150           |         | 0.0400                      |         | 0.0400           |         |                                                        |
| Q1; Q3                                          | 0.000 ; 0.100    |         | 0.000 ; 0.100               |         | 0.000 ; 0.100    |         |                                                        |
| Min; Max                                        | 0.000 ; 32.400   |         | 0.000 ; 3.800               |         | 0.000 ; 32.400   |         |                                                        |
| <b>Lymphocytes B (units/μL)</b>                 |                  |         |                             |         |                  |         | Wilcoxon<br>P = 0.689                                  |
| N                                               | 6                |         | 64                          |         | 70               |         |                                                        |
| Missing                                         | 42               |         | 127                         |         | 169              |         |                                                        |
| Mean (SD)                                       | 0.000 (0.0000)   |         | 0.007 (0.0502)              |         | 0.006 (0.0480)   |         |                                                        |
| Median                                          | 0.000            |         | 0.000                       |         | 0.000            |         |                                                        |
| Q1; Q3                                          | 0.00 ; 0.00      |         | 0.00 ; 0.00                 |         | 0.00 ; 0.00      |         |                                                        |
| Min; Max                                        | 0.00 ; 0.00      |         | 0.00 ; 0.40                 |         | 0.00 ; 0.40      |         |                                                        |
| <b>Platelets (G/L)</b>                          |                  |         |                             |         |                  |         | Wilcoxon<br>P = 0.007                                  |
| N                                               | 47               |         | 191                         |         | 238              |         |                                                        |
| Missing                                         | 1                |         | 0                           |         | 1                |         |                                                        |
| Mean (SD)                                       | 123.6 (73.36)    |         | 157.6 (75.87)               |         | 150.9 (76.44)    |         |                                                        |
| Median                                          | 117.0            |         | 153.0                       |         | 148.0            |         |                                                        |
| Q1; Q3                                          | 71 ; 177         |         | 107 ; 196                   |         | 100 ; 193        |         |                                                        |
| Min; Max                                        | 7 ; 345          |         | 18 ; 638                    |         | 7 ; 638          |         |                                                        |
|                                                 | N=48             |         | N=191                       |         | N=239            |         |                                                        |
| <b>Hemoglobin (g/dL)</b>                        |                  |         |                             |         |                  |         |                                                        |

|                                    | NRM<br>N=48      | Comparative group*<br>N=191 | Total<br>N=239   | Test: Probability     |
|------------------------------------|------------------|-----------------------------|------------------|-----------------------|
| N                                  | 47               | 191                         | 238              |                       |
| Missing                            | 1                | 0                           | 1                |                       |
| Mean (SD)                          | 9.50 (1.378)     | 11.18 (8.175)               | 10.85 (7.376)    | Wilcoxon<br>P = 0.002 |
| Median                             | 9.30             | 10.00                       | 9.90             |                       |
| Q1; Q3                             | 8.3 ; 10.3       | 9.2 ; 11.1                  | 9.0 ; 11.0       |                       |
| Min; Max                           | 7.7 ; 12.6       | 7.4 ; 78.0                  | 7.4 ; 78.0       |                       |
| <b>Leukocytes (WBC) (G/L)</b>      |                  |                             |                  | Wilcoxon<br>P = 0.055 |
| N                                  | 47               | 191                         | 238              |                       |
| Missing                            | 1                | 0                           | 1                |                       |
| Mean (SD)                          | 1.781 (1.2582)   | 2.140 (1.2728)              | 2.069 (1.2753)   |                       |
| Median                             | 1.400            | 1.900                       | 1.900            |                       |
| Q1; Q3                             | 0.80 ; 2.30      | 1.26 ; 2.71                 | 1.20 ; 2.70      |                       |
| Min; Max                           | 0.01 ; 4.80      | 0.00 ; 6.80                 | 0.00 ; 6.80      |                       |
| <b>Neutrophils (ANC/AGC) (G/L)</b> |                  |                             |                  | Wilcoxon<br>P = 0.093 |
| N                                  | 45               | 185                         | 230              |                       |
| Missing                            | 3                | 6                           | 9                |                       |
| Mean (SD)                          | 1.599 (1.5368)   | 1.788 (1.2205)              | 1.751 (1.2870)   |                       |
| Median                             | 1.200            | 1.610                       | 1.515            |                       |
| Q1; Q3                             | 0.70 ; 2.10      | 0.90 ; 2.40                 | 0.90 ; 2.40      |                       |
| Min; Max                           | 0.00 ; 7.90      | 0.00 ; 6.60                 | 0.00 ; 7.90      |                       |
| <b>Lymphocytes (ALC) (G/L)</b>     |                  |                             |                  | Wilcoxon<br>P = 0.683 |
| N                                  | 44               | 177                         | 221              |                       |
| Missing                            | 4                | 14                          | 18               |                       |
| Mean (SD)                          | 0.9384 (4.88331) | 0.1686 (0.46125)            | 0.3218 (2.21948) |                       |
| Median                             | 0.0150           | 0.0400                      | 0.0400           |                       |
| Q1; Q3                             | 0.000 ; 0.100    | 0.000 ; 0.100               | 0.000 ; 0.100    |                       |
| Min; Max                           | 0.000 ; 32.400   | 0.000 ; 3.800               | 0.000 ; 32.400   |                       |
| <b>Lymphocytes B (units/μL)</b>    |                  |                             |                  | Wilcoxon<br>P = 0.689 |
| N                                  | 6                | 64                          | 70               |                       |
| Missing                            | 42               | 127                         | 169              |                       |
| Mean (SD)                          | 0.000 (0.0000)   | 0.007 (0.0502)              | 0.006 (0.0480)   |                       |
| Median                             | 0.000            | 0.000                       | 0.000            |                       |
| Q1; Q3                             | 0.00 ; 0.00      | 0.00 ; 0.00                 | 0.00 ; 0.00      |                       |
| Min; Max                           | 0.00 ; 0.00      | 0.00 ; 0.40                 | 0.00 ; 0.40      |                       |
| <b>Platelets (G/L)</b>             |                  |                             |                  | Wilcoxon<br>P = 0.007 |
| N                                  | 47               | 191                         | 238              |                       |
| Missing                            | 1                | 0                           | 1                |                       |
| Mean (SD)                          | 123.6 (73.36)    | 157.6 (75.87)               | 150.9 (76.44)    |                       |
| Median                             | 117.0            | 153.0                       | 148.0            |                       |
| Q1; Q3                             | 71 ; 177         | 107 ; 196                   | 100 ; 193        |                       |
| Min; Max                           | 7 ; 345          | 18 ; 638                    | 7 ; 638          |                       |
| <b>AST (SGOT) (IU/L)</b>           |                  |                             |                  | Wilcoxon<br>P = 0.568 |
| N                                  | 45               | 190                         | 235              |                       |
| Missing                            | 3                | 1                           | 4                |                       |
| Mean (SD)                          | 27.3 (20.14)     | 24.1 (18.31)                | 24.7 (18.67)     |                       |
| Median                             | 22.0             | 20.5                        | 21.0             |                       |
| Q1; Q3                             | 15 ; 28          | 16 ; 25                     | 16 ; 26          |                       |
| Min; Max                           | 8 ; 102          | 8 ; 205                     | 8 ; 205          |                       |
| <b>ALT (SGPT) (IU/L)</b>           |                  |                             |                  | Wilcoxon<br>P = 0.835 |
| N                                  | 45               | 190                         | 235              |                       |
| Missing                            | 3                | 1                           | 4                |                       |
| Mean (SD)                          | 24.1 (26.01)     | 21.8 (21.91)                | 22.3 (22.71)     |                       |
| Median                             | 16.0             | 17.0                        | 17.0             |                       |
| Q1; Q3                             | 12 ; 26          | 13 ; 25                     | 12 ; 25          |                       |
| Min; Max                           | 5 ; 146          | 6 ; 263                     | 5 ; 263          |                       |

|                   | NRM<br>N=48 | Comparative group*<br>N=191 | Total<br>N=239 | Test: Probability     |
|-------------------|-------------|-----------------------------|----------------|-----------------------|
| <b>LDH (IU/L)</b> |             |                             |                | Wilcoxon<br>P = 0.329 |
| N                 | 44          | 187                         | 231            |                       |
| Missing           | 4           | 4                           | 8              |                       |

|                                      | NRM<br>N=48          | Comparative group*<br>N=191 | Total<br>N=239      | Test: Probability      |
|--------------------------------------|----------------------|-----------------------------|---------------------|------------------------|
| Mean (SD)                            | 359.8 (399.33)       | 273.8 (252.47)              | 290.2 (287.23)      |                        |
| Median                               | 215.0                | 213.0                       | 213.0               |                        |
| Q1; Q3                               | 175 ; 387            | 178 ; 294                   | 177 ; 306           |                        |
| Min; Max                             | 97 ; 2560            | 94 ; 2317                   | 94 ; 2560           |                        |
| <b>Serum creatinine (µmol/L)</b>     |                      |                             |                     | Wilcoxon<br>P = 0.680  |
| N                                    | 47                   | 191                         | 238                 |                        |
| Missing                              | 1                    | 0                           | 1                   |                        |
| Mean (SD)                            | 72.0 (32.08)         | 66.7 (20.63)                | 67.8 (23.35)        |                        |
| Median                               | 67.0                 | 63.0                        | 63.0                |                        |
| Q1; Q3                               | 50 ; 87              | 50 ; 78                     | 50 ; 79             |                        |
| Min; Max                             | 30 ; 176             | 35 ; 151                    | 30 ; 176            |                        |
| <b>Creatinine clearance (mL/min)</b> |                      |                             |                     | Wilcoxon<br>P = 0.719  |
| N                                    | 43                   | 188                         | 231                 |                        |
| Missing                              | 5                    | 3                           | 8                   |                        |
| Mean (SD)                            | 94.0 (33.98)         | 96.1 (27.37)                | 95.7 (28.65)        |                        |
| Median                               | 92.0                 | 90.0                        | 90.0                |                        |
| Q1; Q3                               | 78 ; 102             | 82 ; 107                    | 81 ; 107            |                        |
| Min; Max                             | 33 ; 235             | 30 ; 201                    | 30 ; 235            |                        |
| <b>C Reactive protein (mg/L)</b>     |                      |                             |                     | Wilcoxon<br>P = 0.001  |
| N                                    | 43                   | 187                         | 230                 |                        |
| Missing                              | 5                    | 4                           | 9                   |                        |
| Mean (SD)                            | 42.06 (55.049)       | 21.30 (37.618)              | 25.18 (42.083)      |                        |
| Median                               | 21.00                | 8.00                        | 9.50                |                        |
| Q1; Q3                               | 5.0 ; 50.0           | 4.0 ; 23.0                  | 4.0 ; 27.0          |                        |
| Min; Max                             | 2.0 ; 302.0          | 0.0 ; 299.0                 | 0.0 ; 302.0         |                        |
| <b>Ferritin (µg/L)</b>               |                      |                             |                     | Wilcoxon<br>P = <0.001 |
| N                                    | 41                   | 189                         | 230                 |                        |
| Missing                              | 7                    | 2                           | 9                   |                        |
| Mean (SD)                            | 12325.71 (62517.572) | 1037.43 (2286.931)          | 3049.68 (26565.750) |                        |
| Median                               | 897.00               | 539.00                      | 610.00              |                        |
| Q1; Q3                               | 582.0 ; 2397.0       | 263.0 ; 1028.0              | 292.0 ; 1090.0      |                        |
| Min; Max                             | 114.0 ; 400000.0     | 32.0 ; 27809.0              | 32.0 ; 400000.0     |                        |
| <b>Fibrinogen (g/L)</b>              |                      |                             |                     | Wilcoxon<br>P = 0.667  |
| N                                    | 38                   | 147                         | 185                 |                        |
| Missing                              | 10                   | 44                          | 54                  |                        |
| Mean (SD)                            | 3.893 (1.5628)       | 3.937 (1.1197)              | 3.928 (1.2191)      |                        |
| Median                               | 4.100                | 3.700                       | 3.800               |                        |
| Q1; Q3                               | 3.00 ; 4.70          | 3.20 ; 4.60                 | 3.20 ; 4.60         |                        |
| Min; Max                             | 0.80 ; 7.20          | 1.70 ; 8.00                 | 0.80 ; 8.00         |                        |
| <b>Gamma-GT (IU/L)</b>               |                      |                             |                     | Wilcoxon<br>P = 0.025  |
| N                                    | 42                   | 176                         | 218                 |                        |
| Missing                              | 6                    | 15                          | 21                  |                        |
| Mean (SD)                            | 105.9 (145.79)       | 51.3 (57.20)                | 61.8 (84.38)        |                        |
| Median                               | 51.0                 | 30.0                        | 33.0                |                        |
| Q1; Q3                               | 26 ; 81              | 22 ; 58                     | 22 ; 63             |                        |
| Min; Max                             | 11 ; 579             | 5 ; 420                     | 5 ; 579             |                        |
| <b>Total bilirubin (µmol/L)</b>      |                      |                             |                     | Wilcoxon<br>P = 0.939  |
| N                                    | 45                   | 190                         | 235                 |                        |
| Missing                              | 3                    | 1                           | 4                   |                        |
| Mean (SD)                            | 9.20 (5.492)         | 9.21 (8.488)                | 9.21 (7.991)        |                        |
| Median                               | 7.00                 | 8.00                        | 7.00                |                        |
| Q1; Q3                               | 6.0 ; 12.0           | 6.0 ; 11.0                  | 6.0 ; 11.0          |                        |
| Min; Max                             | 3.0 ; 26.0           | 2.0 ; 109.0                 | 2.0 ; 109.0         |                        |

|                    | NRM<br>N=48  | Comparative group*<br>N=191 | Total<br>N=239 | Test: Probability      |
|--------------------|--------------|-----------------------------|----------------|------------------------|
| <b>EASIX score</b> |              |                             |                | Wilcoxon<br>P = <0.001 |
| N                  | 44           | 187                         | 231            |                        |
| Missing            | 4            | 4                           | 8              |                        |
| Mean (SD)          | 35.0 (46.46) | 17.1 (28.45)                | 20.5 (33.28)   |                        |
| Median             | 16.9         | 9.5                         | 10.4           |                        |

|                               | NRM<br>N=48  | Comparative group*<br>N=191 | Total<br>N=239 | Test: Probability                                       |
|-------------------------------|--------------|-----------------------------|----------------|---------------------------------------------------------|
| Q1; Q3                        | 8 ; 38       | 6 ; 17                      | 7 ; 21         |                                                         |
| Min; Max                      | 3 ; 208      | 1 ; 277                     | 1 ; 277        |                                                         |
| <b>Simplified EASIX score</b> |              |                             |                | Wilcoxon<br>P = 0.001                                   |
| N                             | 44           | 187                         | 231            |                                                         |
| Missing                       | 4            | 4                           | 8              |                                                         |
| Mean (SD)                     | 5.9 (9.39)   | 2.6 (4.83)                  | 3.2 (6.08)     |                                                         |
| Median                        | 2.4          | 1.5                         | 1.6            |                                                         |
| Q1; Q3                        | 1 ; 5        | 1 ; 2                       | 1 ; 3          |                                                         |
| Min; Max                      | 1 ; 53       | 0 ; 46                      | 0 ; 53         |                                                         |
| <b>Modified EASIX score</b>   |              |                             |                | Wilcoxon<br>P = <0.001                                  |
| N                             | 41           | 183                         | 224            |                                                         |
| Missing                       | 7            | 8                           | 15             |                                                         |
| Mean (SD)                     | 36.4 (84.36) | 11.0 (51.04)                | 15.6 (59.16)   |                                                         |
| Median                        | 5.0          | 1.4                         | 1.7            |                                                         |
| Q1; Q3                        | 1 ; 24       | 0 ; 4                       | 1 ; 5          |                                                         |
| Min; Max                      | 0 ; 427      | 0 ; 507                     | 0 ; 507        |                                                         |
| <b>EASIX-F score</b>          |              |                             |                | Cochran-Mantel-Haenszel<br>Row Mean Score<br>P = <0.001 |
| High risk                     | 19 (50.0%)   | 40 (22.1%)                  | 59 (26.9%)     |                                                         |
| Low risk                      | 19 (50.0%)   | 141 (77.9%)                 | 160 (73.1%)    |                                                         |
| (-)                           | 10           | 10                          | 20             |                                                         |
| <b>EASIX-FC score</b>         |              |                             |                | Cochran-Mantel-Haenszel<br>Row Mean Score<br>P = -      |
| Low risk                      | 13 (100.0%)  | 113 (100.0%)                | 126 (100.0%)   |                                                         |
| (-)                           | 35           | 78                          | 113            |                                                         |

## S5. Risk factors for overall NRM of infectious cause – univariate analysis – p32

Risk factors for overall NRM of infectious cause were identified by comparing the characteristics of overall NRM population with patients alive at 1 year following CAR T-cell infusion.

The abbreviation NRM denotes non-relapse mortality; ECOG PS: Eastern Cooperative Oncology Group performance status; LDH: lactate dehydrogenase; Axi-cel: axicabtagene ciloleucel; Tisacel: tisagenlecleucel.

|                          |                                               | All NRM of infectious cause<br>N=27 | Comparative group<br>N= 191 | p value |
|--------------------------|-----------------------------------------------|-------------------------------------|-----------------------------|---------|
| Patient characteristics  | Age - Median                                  | 67                                  | 63                          | 0.020   |
|                          | Diabetes - no. (%)                            | 9 (34.6)                            | 19 (10.1)                   | 0.002   |
| At lymphodepletion       | ECOG PS - no. (%)                             | 20 (76.9)                           | 176 (95.1)                  | 0.005   |
|                          | 0-1                                           | 6 (23.1)                            | 9 (4.9)                     |         |
|                          | ≥ 2                                           |                                     |                             |         |
|                          | Hemoglobin (g/dL) - Median                    | 9.7                                 | 10.7                        | 0.045   |
|                          | Platelets (G/L) - Median                      | 173                                 | 188                         | 0.243   |
|                          | C reactive protein (mg/L) - Median            | 14                                  | 5                           | 0.002   |
|                          | Ferritin (µg/L) - Median                      | 766                                 | 393                         | 0.064   |
|                          | Hypogammaglobulinemia – no. (%)               | 13 (65)                             | 72 (48)                     | 0.233   |
|                          | CAR-HEMATOTOX - no. (%)                       | 13 (48.1)                           | 136 (71.2)                  | 0.025   |
| Low                      | 14 (51.9)                                     | 69 (31.7)                           |                             |         |
| High                     |                                               |                                     |                             |         |
| EASIX score - Median     | 13                                            | 10                                  | 0.072                       |         |
| At infusion              | CAR-T product - no. (%)                       | 18 (66.7)                           | 139 (72.8)                  | 0.499   |
|                          | Axi-cel                                       | 9 (33.3)                            | 52 (27.2)                   |         |
|                          | Tisacel                                       |                                     |                             |         |
|                          | Hemoglobin (g/dL) - Median                    | 9.8                                 | 10.0                        | 0.052   |
|                          | Platelets (G/L) - Median                      | 132                                 | 153                         | 0.100   |
|                          | C reactive protein (mg/L) - Median            | 19                                  | 8                           | 0.016   |
| LDH (IU/L) - Median      | 198                                           | 213                                 | 0.893                       |         |
| Ferritin (µg/L) - Median | 821                                           | 539                                 | 0.047                       |         |
| Post-infusion            | CRS ≥ grade 3 - no. (%)                       | 5 (18.5)                            | 10 (5.2)                    | 0.025   |
|                          | ICANS ≥ grade 3 - no. (%)                     | 6 (22.2)                            | 20 (10.5)                   | 0.106   |
|                          | Grade 4 neutropenia at month 1 – no. (%)      | 3 (15.8)                            | 19 (10.5)                   | 0.446   |
|                          | Grade 4 thrombocytopenia at month 1 – no. (%) | 4 (17.4)                            | 23 (12.3)                   | 0.509   |
|                          | Hemoglobin (g/dL) at month 1 - Median         | 9.8                                 | 10.8                        | 0.027   |
|                          | Grade 4 neutropenia at month 3 – no. (%)      | 2 (11.8)                            | 5 (2.7)                     | 0.112   |
|                          | Grade 4 thrombocytopenia at month 3 – no. (%) | 2 (12.5)                            | 4 (2.2)                     | 0.075   |
|                          | Hemoglobin (g/dL) at month 3 - Median         | 11.1                                | 11.6                        | 0.168   |
|                          | Grade 4 neutropenia at month 6 – no. (%)      | 0 (0)                               | 5 (2.9)                     | 1.000   |
|                          | Grade 4 thrombocytopenia at month 6 – no. (%) | 0 (0)                               | 3 (1.8)                     | 1.000   |
|                          | Hemoglobin (g/dL) at month 6 - Median         | 11.8                                | 12.30                       | 0.497   |
|                          | Grade 4 neutropenia at month 12 – no. (%)     | 0 (0)                               | 3 (1.8)                     | 1.000   |
|                          | Hemoglobin (g/dL) at month 12 - Median        | 12.9                                | 12.9                        | 1.000   |
